## Genomic evidence of genetic variation with pleiotropic effects on caterpillar fitness and plant traits in a model legume

Zachariah Gompert<sup>1,2\*</sup>, Megan Brady<sup>1</sup>, Farzaneh Chalyavi<sup>3</sup>, Tara C. Saley<sup>1,2</sup>, Casey S. Philbin<sup>3</sup>, Matthew J. Tucker<sup>3</sup>, Matt L. Forister<sup>4</sup>, Lauren K. Lucas<sup>1</sup>

<sup>1</sup> Department of Biology, Utah State University, Logan, UT 84322, USA

<sup>2</sup> Ecology Center, Utah State University, Logan, UT 84322, USA

<sup>3</sup> Department of Chemistry, University of Nevada, Reno, NV 89557, USA

<sup>4</sup> Department of Biology, University of Nevada, Reno, NV 89557, USA

*Corresponding author:* Zachariah Gompert  
Department of Biology  
5305 Old Main Hill  
Utah State University  
Logan, UT 84322-5305  
Phone: (435) 797-9461  
Email: zach.gompert@usu.edu

**Running title: Genetics of a plant-insect interaction**

## 1 Abstract

2 Plant-insect interactions are ubiquitous, and have been studied intensely because of their  
3 relevance to damage and pollination in agricultural plants, and to the ecology and evolu-  
4 tion of biodiversity. Variation within species can affect the outcome of these interactions,  
5 such as whether an insect successfully develops on a plant species. Whereas specific genes  
6 and chemicals that mediate these interactions have been identified, studies of genome- or  
7 metabolome-wide intraspecific variation might be necessary to better explain patterns of  
8 host-plant use and adaptation often observed in the wild. Here, we present such a study.  
9 Specifically, we assess the consequences of genome-wide genetic variation in the model plant  
10 *Medicago truncatula* for *Lycaeides melissa* caterpillar growth and survival (i.e., larval perfor-  
11 mance). Using a rearing experiment and a whole-genome SNP data set (>5 million SNPs),  
12 we show that polygenic variation in *M. truncatula* explains 9–41% of the observed varia-  
13 tion in caterpillar growth and survival. We detect genetic correlations among caterpillar  
14 performance and other plant traits, such as structural defenses and some anonymous chemi-  
15 cal features; these genetic correlations demonstrate that multiple *M. truncatula* alleles have  
16 pleiotropic effects on plant traits and caterpillar growth or survival (or that there is sub-  
17 stantial linkage disequilibrium among loci affecting these traits). We further show that a  
18 moderate proportion of the genetic effect of *M. truncatula* alleles on *L. melissa* performance  
19 can be explained by the effect of these alleles on the plant traits we measured, especially  
20 leaf toughness. Taken together, our results show that intraspecific genetic variation in *M.*  
21 *truncatula* has a substantial effect on the successful development of *L. melissa* caterpillars  
22 (i.e., on a plant-insect interaction), and further point toward traits mediating this genetic  
23 effect.

24 **Keywords:** plant-insect interactions, herbivory, genomic prediction, quantitative  
25 genetics, attenuated total reflectance infrared (ATR-IR) spectroscopy, structural  
26 defense

## 27 Introduction

28 Organisms interact with members of other species in myriad ways, including competition  
29 for resources, predation, parasitism, herbivory, mutualism and pollination. Phenotypic and  
30 genetic variation within species can affect the outcome of these interspecific interactions  
31 (Bolnick *et al.*, 2002; Crutsinger *et al.*, 2006; Farkas *et al.*, 2013; Thompson, 2013; Hendry,  
32 2016). For example, a genetic polymorphism for cryptic color pattern affects the probability  
33 that *Timema cristinae* stick insects are predated by birds (Nosil, 2004; Nosil *et al.*, 2018), and  
34 allelic variation in *Daphnia magna* and its bacterial microparasite, *Pasteuria ramosa*, alters  
35 infection rates (Carius *et al.*, 2001; Luijckx *et al.*, 2011, 2013). Intraspecific variation can  
36 also affect the establishment and evolution (or co-evolution) of new interactions, including  
37 those that form following species introductions (e.g., Cox, 2004; Strauss *et al.*, 2006; Lankau,  
38 2012; Mandeville *et al.*, 2017).

39 Interactions between plants and herbivorous insects have received considerable scien-  
40 tific attention due to their ubiquity (Forister *et al.*, 2015), their agricultural relevance (Via,  
41 1990; Schoonhoven *et al.*, 2010), and their hypothesized contribution to the extreme bio-  
42 diversity of these taxonomic groups (via co-evolutionary diversification; Ehrlich & Raven,  
43 1964; Mitter *et al.*, 1988; Fordyce, 2010; Edger *et al.*, 2015; Braga *et al.*, 2018). These  
44 interactions are often affected by genetic variation within species, including variation in  
45 plant resistance to insects, and for insect acceptance of and performance on potential host  
46 plants (e.g., Rausher & Simms, 1989; Via, 1990; Berenbaum & Zangerl, 1998; Stowe, 1998;  
47 Dambroski *et al.*, 2005; Ordas *et al.*, 2009; Schoonhoven *et al.*, 2010; Gompert *et al.*, 2015;  
48 Mitchell *et al.*, 2016; Nouhaud *et al.*, 2018). Progress in explaining this variation has been  
49 made by identifying specific phytochemicals responsible for resistance to insects (e.g., fura-  
50 nocoumarins and glucosinolates), as well as the insect genes and pathways that detoxify these  
51 compounds (e.g., cytochrome P450 enzymes, nitrile specifier protein, etc.; Li *et al.*, 2003;  
52 Wen *et al.*, 2006; Wheat *et al.*, 2007; Schoonhoven *et al.*, 2010). Genomic and metabolomic

53 approaches have begun to provide a more complete view of how within-species variation  
54 affects plant-insect interactions (e.g., Harrison *et al.*, 2018; Nallu *et al.*, 2018). As an ex-  
55 ample, a recent study of intraspecific variation across 770 traits (including 753 chemical  
56 features) in alfalfa showed that among-plant variation in insect herbivore communities was  
57 best explained by non-linear interactions among suites of plant traits (Harrison *et al.*, 2018).  
58 Such findings highlight the need for quantitative, genome-, phenome- and metabolome-scale  
59 analyses of the ecological and evolutionary consequences of intraspecific variation in plant-  
60 insect systems. In fact, these approaches may be necessary to explain the geographic mosaic  
61 of host-plant use and plant-insect co-evolution found in nature (but see, e.g., Berenbaum  
62 & Zangerl, 1998), in other words, to address questions such as: (i) Why are certain plant  
63 species fed on by a species of insect in some places but not others?, and (ii) To what extent  
64 do different host-plant populations represent distinct adaptive landscapes?.

65 Here, we take an initial step towards this larger aim by quantifying the effect of  
66 genome-wide plant genetic variation on caterpillar performance (weight and survival) in  
67 the Melissa blue butterfly, *Lycaeides melissa* (Lepidoptera: Lycaenidae). *Lycaeides melissa*  
68 butterflies are found throughout western North America where they feed on various legume  
69 hosts, particularly from the genera *Astragalus* and *Lupinus* (Scott, 1986). *Medicago sativa*  
70 (alfalfa) is a legume native to Eurasia that was introduced to North America ~250 years ago  
71 as a forage crop (Michaud *et al.*, 1988). Since then, *L. melissa* has repeatedly colonized *M.*  
72 *sativa*, and numerous *L. melissa* populations now use this plant as their primary host, espe-  
73 cially where *M. sativa* has escaped from cultivation along roadsides and trails (Chaturvedi  
74 *et al.*, 2018). *Lycaeides melissa* populations that use *M. sativa* show evidence of adapta-  
75 tion to this host, such as increased oviposition preference and larval performance (Forister  
76 *et al.*, 2012; Gompert *et al.*, 2015). However, *M. sativa* remains an inferior host in terms  
77 of larval performance relative to other common hosts, and many *M. sativa* populations are  
78 not used by *L. melissa* within *L. melissa*'s range (Forister *et al.*, 2009). Thus, host use in  
79 *L. melissa* comprises a mosaic of occupied and unoccupied patches of *M. sativa* and native

80 legume hosts. Previous experiments documented genetic variation within *L. melissa* popu-  
81 lations for larval performance on *M. sativa* (Gompert *et al.*, 2015), and also showed that *M.*  
82 *sativa* populations vary in their suitability for *L. melissa* caterpillars (Harrison *et al.*, 2016).  
83 However, past experiments were not designed to parse genetic versus environmental contribu-  
84 tions to host-plant suitability (this distinction is critical for co-evolutionary dynamics), nor  
85 to identify specific plant traits (or plant genes) affecting *L. melissa* caterpillar performance.

86 Our ultimate goal is to explain variation in the (relatively recently established) inter-  
87 action between *M. sativa* and *L. melissa* across the landscape. This includes determining to  
88 what extent genetic differences among *M. sativa* plants affect whether a *M. sativa* population  
89 is colonized by *L. melissa*, and to what extent genetic differences among plant populations  
90 affect subsequent ecological and evolutionary dynamics and outcomes (e.g., *L. melissa* de-  
91 mographics, the degree of host adaptation, etc.). Despite its role in agriculture, genomic  
92 resources for *M. sativa* are limited. Consequently, in the present study we use the model  
93 plant *Medicago truncatula* as a proxy for *M. sativa*. *Medicago truncatula* is a close relative  
94 of *M. sativa* that occurs throughout the Mediterranean basin in Europe and is cultivated  
95 in Australia (Choi *et al.*, 2004a,b). Because of its modest genome size ( $\sim 500$  million base  
96 pairs), simple diploid genetics, and short generation time ( $\sim 10$  weeks), *M. truncatula* has  
97 been developed as the model species for legumes (Young & Udvardi, 2009; Young *et al.*,  
98 2011). Resources for this species include a high-quality reference genome and hundreds of  
99 fully sequenced, inbred lines derived from natural accessions (Young *et al.*, 2011; Stanton-  
100 Geddes *et al.*, 2013). Unlike *M. sativa*, *M. truncatula* is not found in North America and  
101 thus is not available as a host for *L. melissa* (i.e., it is not part of *L. melissa*'s realized  
102 niche). However, both *Medicago* species could be used by other *Lycaeides* in Eurasia where  
103 most of the biodiversity in this genus is found (North American *Lycaeides* are descended  
104 from Eurasian ancestors that came across the Bering land bridge about two million years  
105 ago; Gompert *et al.*, 2008; Vila *et al.*, 2011). Thus, while our results do not directly assess  
106 variation in *M. sativa*, they can show the potential for intraspecific plant genetic variation to

107 affect plant-insect interactions in this system; further, we hypothesize that the *M. truncatula*  
108 genes and traits affecting caterpillar performance will function similarly in *M. sativa*.

109 In this study, we combine statistical genomic methods with a caterpillar rearing ex-  
110 periment to assess the effect of *M. truncatula* phenotypic and genetic variation on *L. melissa*  
111 caterpillar performance. We address the following specific questions: (i) How much of the  
112 variation in *L. melissa* growth and survival can be explained by genetic variation in *M.*  
113 *truncatula*?, (ii) Do genetic loci that affect a set of measured plant traits (some putatively  
114 associated with plant vigor or defense) have pleiotropic effects on caterpillar performance?,  
115 and (iii) How well do the effects of *M. truncatula* alleles on the measured plant traits explain  
116 their effects on caterpillar performance. Thus, we quantify the direct effect of *M. truncatula*  
117 genetic variation on caterpillar performance, and its effect through a set of plant traits. We  
118 think that this combination of approaches has the potential to (a) provide a more mechanis-  
119 tic understanding of this plant-insect interaction by connecting genetic patterns with plant  
120 traits, and (b) discover previously un hypothesized sources of variation in caterpillar perfor-  
121 mance by identifying alleles associated with caterpillar performance that are not associated  
122 with any of the plant traits we measured. Moreover, the methods and approaches we use  
123 allow us to generate statistical and functional information about the genetic basis of this  
124 interaction even if it is polygenic (see Methods and Results for details).

## 125 **Methods**

### 126 **Plant propagation and trait measurements**

127 We obtained seeds from 100 *M. truncatula* lines, which are part of the *Medicago* HapMap  
128 project (<http://www.medicagohapmap.org>). Seeds (i.e., germplasm) were obtained from  
129 INRA-Montpellier (Montpellier, France), and from the USDA Agricultural Research Station  
130 at Washington State University (Pullman, WA, USA; Table S1). Each line was derived from a

131 natural accession, but has since been inbred to near complete homozygosity. Whole genome  
132 sequences are available for each line (Branca *et al.*, 2011; Stanton-Geddes *et al.*, 2013),  
133 and the lines have been used in other genome-wide association mapping studies (GWAS),  
134 including GWAS on biomass, drought-related traits, plant defenses, flowering time, and  
135 nodulation (e.g., Stanton-Geddes *et al.*, 2013; Kang *et al.*, 2015).

136 We planted five replicate pots with seeds from each of the 100 *M. truncatula* lines  
137 on May 4th and 5th, 2017 (see “Planting and tending *Medicago truncatula*” in the online  
138 supplemental material [OSM] for additional details). *Medicago truncatula* plants were grown  
139 in a greenhouse under ambient light (~14–15 hours of daylight) at approximately 18–27°C  
140 (with variable humidity), and were watered daily or every other day as needed. We thinned  
141 the *M. truncatula* seedlings on May 26th (i.e., after germination was complete) to ensure  
142 that no pots had more than two plants. This was done to minimize competition among  
143 plants, while still providing sufficient plant biomass for the caterpillar rearing experiments.  
144 A few plant lines had low germination rates and were dropped from the experiment leaving  
145 us with 94 lines, each with five replicate pots.

146 We measured a series of morphological traits potentially associated with plant vigor  
147 or resistance to insects (e.g., putative structural plant defenses; Table 1; Levin, 1973; Hanley  
148 *et al.*, 2007; Malishev & Sanson, 2015). First, 20 days after planting, we measured **leaf size**  
149 (length, width and area), **leaf shape** (length/width), **trichome density**, **dry leaf weight**  
150 and **specific leaf area** (SLA) for each plant line and replicate (pot) (we haphazardly selected  
151 one of the two plants in each pot for taking measurements). We chose the second true leaf  
152 for these measurements (that is leaf 1 from branch B0, see Figs. 1 & 2 from Moreau, 2006).  
153 We measured the width (at the widest point) and length (along the midvein) of the middle  
154 leaflet with calipers (each leaf comprises three leaflets; measurements were taken to the  
155 nearest 1 mm). Next, we calculated leaf area (length × width) and shape (length/width)  
156 from these measurements. We then counted the number of trichomes in a 2.5 mm diameter  
157 circle directly adjacent to the midvein under a stereoscope (35× magnification). The three

158 leaflets from each plant were then placed in a coin envelope in a bin with desiccant. The  
159 dry weight of the middle leaflet from each of these leaves was measured on a Mettler Toledo  
160 XPE105 analytical microbalance (Mettler Toledo) to the nearest 0.01 mg. Leaf area and dry  
161 weight were used to calculate SLA (SLA is the ratio of leaf area to dry mass and is often  
162 correlated with leaf mechanical properties, such as work to tear, shear or punch; Hanley  
163 *et al.*, 2007).

164 We measured **plant height**, from the cotyledons to the tip of the longest branch, 31  
165 days after planting (again, we haphazardly selected one of the two plants in each pot for  
166 taking this measurement). **Leaf toughness** was measured 33 days after planting using a  
167 penetrometer. We selected the main leaf from the second primary branch for this assay. The  
168 force required to penetrate each of the three leaflets along the midvein was recorded. We  
169 took the mean of these three measures as a metric of leaf toughness.

170 Plant chemistry was quantified with **attenuated total reflectance infrared** (ATR-  
171 IR) spectroscopy. ATR-IR spectroscopy constitutes a quick, cost-effective method to analyze  
172 a range of organic chemical compounds in plant and animal tissues. Although the absorbance  
173 is directly related to the concentration of specific chemical signatures, there is not a simple  
174 one-to-one relationship between IR spectral patterns and specific chemical compounds of in-  
175 terest. Moreover, spectral features are the summation of similar overlapping IR transitions,  
176 representative of various compounds within a tissue. Consequently, IR data are often com-  
177 bined with more specific compositional analyses (e.g., HPLC-MS). The combined data can  
178 be used to construct a multivariate model linking IR spectral data to chemical compounds  
179 (e.g., Foley *et al.*, 1998; Ramirez *et al.*, 2015; Costa *et al.*, 2018). This was not our goal here.  
180 We instead used IR spectral features as anonymous chemical markers (akin to AFLPs for  
181 genetic analyses) which could be connected to the presence of specific molecules in future  
182 work using compositional methods such as liquid chromatography–mass spectrometry.

183 Infrared spectra were collected using a Thermo Nicolet 6700 FTIR (a high-resolution  
184 instrument with a diamond crystal ATR), which was used to scan 4000-600  $\text{cm}^{-1}$  of the



185 infrared spectrum. Leaves were placed in direct contact with the diamond crystal, and the  
186 average of 32 scans was recorded for each leaf surface with  $4\text{ cm}^{-1}$  resolution. A Norris-  
187 Williams second derivative spectrum was calculated for each transmittance measurement  
188 using 5-point smoothing and a gap size of 5 segments (absorbance is directly proportional to  
189 concentration [Beer's Law], and absorbance =  $-\log(\text{transmittance})$ ). We focused on the sub-  
190 set of IR features between  $\sim 750$  and  $1100\text{ cm}^{-1}$  and with  $>10\%$  of the phenotypic variation  
191 partitioned among plant lines (see Fig. S1).

## 192 Caterpillar husbandry and performance assays

193 We obtained neonate *L. melissa* caterpillars for larval performance assays on the *M. truncat-*  
194 *ula* accessions. First, 26 female *L. melissa* butterflies were collected on June 5th (2017) from  
195 a site along the Bonneville shoreline trail in northern Utah, USA ( $41.725^\circ\text{N}$ ,  $111.794^\circ\text{W}$ ,  
196  $1513\text{ m}$  elevation). As in past work (e.g., Forister *et al.*, 2013; Gompert *et al.*, 2015), these  
197 butterflies were caged individually in plastic oviposition chambers along with a few sprigs of  
198 their host plant (*Medicago sativa*). After 48 hours, *L. melissa* eggs were collected from the  
199 host-plant material and placed in unvented Petri dishes in a Percival incubator (model no.  
200 136VL;  $27^\circ\text{C}$ ; 14 hrs. light:10 hrs. dark) until they hatched.

201 Caterpillars began to emerge on June 9th, and were then placed in individual unvented  
202 Petri dishes with a leaf from one of the 94 *M. truncatula* accessions (i.e., on one of the 94  
203 plant lines). We inspected caterpillars daily, adding new leaf material from the same plant  
204 line as needed (as in Gompert *et al.*, 2015). We rotated the replicate/pot used for each  
205 plant line each day. Thus, caterpillars only ate leaves from a single plant line (genotype),  
206 but fed on all five replicate pots. Caterpillars were maintained in a Percival incubator at  
207  $27^\circ\text{C}$  with 14 hour days (10 hours of dark). We reared 486 caterpillars total ( $\sim 5$  per plant  
208 line). We checked all caterpillars daily for survival and recorded **survival to pupation** and  
209 **survival to eclosion** as adults. As an additional metric of performance, we measured **8-**  
210 **and 16-day caterpillar weight** (*L. melissa* caterpillars generally spend 20 to 30 days as

211 larvae) on a Mettler Toledo XPE105 analytical microbalance (Mettler Toledo; weights were  
212 recorded to the nearest 0.01 mg). Weight and lifetime fecundity are highly correlated in *L.*  
213 *melissa* (Forister *et al.*, 2009).

## 214 **Variance partitioning**

215 Our analyses focus on the 9 plant morphological traits (leaf length, leaf width, leaf area,  
216 leaf shape, leaf dry weight, SLA, trichome density, leaf toughness and plant height), 19 IR  
217 traits (i.e., anonymous chemical features), and four caterpillar performance traits (weight at  
218 8 days, weight at 16 days, survival to pupation, and survival to eclosion; survival is a binary  
219 trait; Table 1). Prior to genetic mapping and genomic prediction, we first quantified the  
220 proportion of trait variation found among plant lines (i.e., genotypes) for each of these 32  
221 traits. As we are working with replicated, inbred lines, these are estimates of the broad-sense  
222 heritability for each of the traits (with respect to plant not caterpillar genotypes; because  
223 caterpillars fed across plants of a genotype, these estimates are upper bounds for the broad-  
224 sense heritabilities of the caterpillar performance traits).

225 We estimated the among-line variance for each trait by fitting linear mixed-effect  
226 models via restricted maximum likelihood (REML). This was done with the `lmer` function  
227 in `lme4` R package (package version 1.1.19, R version 3.4.4; Bates *et al.*, 2015). We then tested  
228 the null hypothesis that the among-line variance was 0 using an exact restricted likelihood  
229 ratio test, which was based on 10,000 simulated values to approximate the null distribution  
230 (Crainiceanu & Ruppert, 2004; Greven *et al.*, 2008). This was done with the `exactRLRT`  
231 function in the `RLRsim` package in R (version 3.1.3; Scheipl *et al.*, 2008).

## 232 ***Medicago truncatula* genomic data**

233 Whole-genome SNP data for the *M. truncatula* accessions were obtained from the *M. truncat-*  
234 *ula* HapMap project (<http://www.medicagohapmap.org/>; version Mt4.01; Stanton-Geddes

235 *et al.*, 2013). These data comprised 40 million SNPs, which were mapped to the *M. truncat-*  
236 *ula* reference genome v4.0 (we used the quality-filtered SNP bcf files; Young *et al.*, 2011).  
237 We applied additional quality filters to these data with `vcftools` (version 0.1.15; Danecek  
238 *et al.*, 2011) such that we only retained bi-allelic SNPs with minor allele frequencies  $\geq 0.01$ ,  
239 and with a minimum sequencing depth of  $2\times$  per individual, no more than 20% missing data  
240 (across the 94 lines analyzed in this study), and a phred-scaled quality score of  $\geq 30$ . We  
241 only considered SNPs mapped to the eight *M. truncatula* chromosomes. Approximately 13  
242 million SNPs passed these filters. We then used `plink` (version 1.09; Purcell *et al.*, 2007) to  
243 remove redundant SNPs, that is SNPs that were in very high linkage disequilibrium (LD)  
244 with each other. Specifically, using the `indep-pairwise` command, one of each pair of high-  
245 LD SNPs, defined as  $r^2 \geq 0.8$  in a 10 kilobase (kb) window, was pruned. After this step, we  
246 retained 5,648,722 SNPs for downstream analyses.

247 The *M. truncatula* HapMap data set included SNP genotype calls and relative geno-  
248 type likelihoods generated by `GATK` (McKenna *et al.*, 2010). Rather than use the raw  
249 genotype calls (which ignore uncertainty in genotypes and information from population  
250 allele frequencies), we used an empirical Bayesian approach to obtain estimates of geno-  
251 types based on the genotype likelihoods and a prior defined by the allele frequencies at  
252 each locus. As in past work (e.g., Gompert *et al.*, 2015), we first used an expectation-  
253 maximization algorithm to obtain maximum likelihood estimates of the allele frequencies  
254 for each SNP. This was done with the computer program `estpEM` (in Dryad repository,  
255 doi:<https://doi.org/10.5061/dryad.nq67q>; Soria-Carrasco *et al.*, 2014; Riesch *et al.*,  
256 2017). This program implements the EM algorithm from Li *et al.* (2009) and provides  
257 allele frequency estimates that account for genotype uncertainty. Prior probabilities for  
258 each genotype were then specified based on the allele frequencies, such that  $\Pr(g_{ij}|p_i) \sim$   
259  $\text{binomial}(p_i, n = 2)$ , where  $g_{ij}$  denotes the genotype at locus  $i$  for individual  $j$ , and  $p_i$  de-  
260 notes the non-reference allele frequency. Next, we computed the posterior probability of each  
261 genotype according to Bayes theorem, and obtained point estimates (posterior means) for

262 genotypes  $\bar{g}_{ij} = \sum_{k \in \{0,1,2\}} kL(g_{ij} = k)\Pr(g_{ij} = k|p_i)$ , where  $L(g_{ij} = k)$  is the relative geno-  
263 type likelihood based on the sequence data and associated quality scores. These genotype  
264 estimates take on values between 0 (reference-allele homozygote) and 2 (non-reference-allele  
265 homozygote), but are not constrained to be integer values.

## 266 **Genome-wide association mapping and genomic prediction**

267 We fit Bayesian sparse linear mixed models (BSLMs; Zhou *et al.*, 2013) with **gemma** (ver-  
268 sion 0.94.1) to quantify the contribution of *M. truncatula* (i.e., plant) genetic variation to  
269 phenotypic variation in the plant traits and *L. melissa* caterpillar performance. Unlike tra-  
270 ditional genome-wide association mapping methods, BSLMs fit a single model with all  
271 SNPs simultaneously and thus mostly avoid issues related to testing large numbers of null  
272 hypotheses. In particular, trait values are modeled as a function of a polygenic term and a  
273 vector of the (possible) measurable effects (associations) of each SNP on the trait ( $\beta$ ; Zhou  
274 *et al.*, 2013). Variable selection is used to estimate the SNP effects; SNPs can be assigned an  
275 effect of 0 (not in the model) or a non-zero effect (in the model) (Guan & Stephens, 2011).  
276 A Markov chain Monte Carlo (MCMC) algorithm is used to infer the posterior inclusion  
277 probability (PIP) for each SNP, that is, the probability that each SNP has a non-zero effect.  
278 The polygenic term defines an individual's expected deviation from the grand phenotypic  
279 mean based on all of the SNPs. It accounts for phenotypic covariances among individuals  
280 caused by their relatedness or overall genetic similarity (i.e., observed kinship; Zhou *et al.*,  
281 2013). The kinship matrix also serves to control for population structure and relatedness  
282 when estimating the effects of individual SNPs ( $\beta$ ) along with their PIPs. Likewise, SNPs  
283 in LD with the same causal variant effectively account for each other, such that only one or  
284 the other is needed in the model, and this is captured by the PIPs.

285 The hierarchical structure of the model provides a way to estimate additional param-  
286 eters that describe aspects of a trait's genetic architecture (Guan & Stephens, 2011; Zhou  
287 *et al.*, 2013; Lucas *et al.*, 2018). These include the proportion of the phenotypic variance

288 explained (PVE) by additive genetic effects (this includes  $\beta$  and the polygenic term, and  
289 should approach the narrow-sense heritability), the proportion of the PVE due to SNPs with  
290 measurable effects or associations (this is called PGE and is based only on  $\beta$ ), and the num-  
291 ber of SNPs with measurable associations ( $n-\gamma$ ). All of these metrics integrate (via MCMC)  
292 over uncertainty in the effects of individual SNPs, including whether these are non-zero.  
293 Likewise, BSLMMs can be used to obtain genomic estimated breeding values (GEBVs), that  
294 is, the expected trait value for an individual from the additive effects of their genes as cap-  
295 tured by both  $\beta$  and the polygenic term (Lucas *et al.*, 2018). Most other genomic prediction  
296 methods provide GEBVs based solely on a polygenic term (e.g., Meuwissen *et al.*, 2001;  
297 Hayes *et al.*, 2009; Ober *et al.*, 2012).

298 We fit BSLMMs for each of 32 traits using `gemma` (version 0.94.1; Zhou *et al.*, 2013)  
299 with 15 MCMC chains each with a 500,000 iteration burn-in followed by 2 million sampling  
300 iterations with a thinning interval of 20. GEBVs were obtained using the `-predict 1` option,  
301 with predictions averaged over the 15 MCMC chains. GEBVs were used to estimate genetic  
302 correlations among traits (i.e., a standardized G-matrix). As a guard against statistical  
303 artifacts, we fit BSLMMs to 12 pseudo (randomized)-data sets derived from the caterpillar  
304 data (while these methods have been assessed in detail elsewhere, e.g., Zhou *et al.*, 2013;  
305 Gompert *et al.*, 2017, we were particularly concerned that the low number of survivors and  
306 binary data for survival could lead to spurious association; for details, see “BSLMMs fit to  
307 randomized data” in the OSM).

## 308 **Connecting plant trait genetics with caterpillar performance**

309 Genetic covariances (correlations) among plant and caterpillar traits (as captured by the  
310 G-matrix) can provide evidence of a shared genetic basis for these traits. However, these  
311 treat pairs of traits independently and do not formally quantify the total contribution of  
312 alleles affecting the measured plant traits to the alleles affecting caterpillar performance.  
313 Thus, we next assessed the extent to which we could explain variation in the caterpillar

314 performance GEBVs based on the GEBVs for the plant morphology and chemistry traits, as  
315 well as which plant trait GEBVs were most important for this. In other words, we wanted  
316 to know how well we could explain (or predict) the caterpillar performance GEBVs (that is,  
317 the expected performance trait values based on plant genetics) from the subset of genetic  
318 variants associated with phenotyped plant traits (as captured by the plant trait GEBVs,  
319 and thus weighted by their effects on the plant traits). High explanatory (or predictive)  
320 power would imply that most of the *M. truncatula* genetic variants affecting caterpillar  
321 performance either had pleiotropic effects on some of the plant traits we measured or were  
322 tightly linked to genetic variants that affected these traits. This should also allow us to  
323 identify specific plant traits that share a common genetic basis with (and thus potential  
324 causal link to) caterpillar performance. We used two complementary approaches to answer  
325 this question: (i) multiple regression with Bayesian model averaging, and (ii) random forest  
326 regression. A key distinction between these methods is whether they assume linear (multiple  
327 regression) or non-linear (random forest regression) relationships between predictors and  
328 response variables. Note that for each plant and caterpillar trait, there was a single GEBV  
329 estimate per plant line, and thus the sample size for these analyses was  $N = 94$  plant lines.

330 We used multiple regression with Bayesian model averaging to identify the subset of  
331 predictors (plant GEBVs) that best explained variation in caterpillar performance GEBVs,  
332 while accounting for uncertainty in the effects of each covariate including which covariates  
333 have non-zero effects. The multiple regression models were fit with the **BMS** R package  
334 (package version 0.3.4, R version 3.4.2; Zeugner & Feldkircher, 2015). Zellner's g-prior was  
335 used for the regression coefficients with  $g = N$ , where  $N$  is the number of observations ( $N =$   
336  $94$ ; Zellner, 1986), and a uniform prior was used for the different models (i.e., sets of covariates  
337 with non-zero effects; Zeugner & Feldkircher, 2015). Parameter estimates were obtained  
338 using MCMC with a 5000 iteration burnin-in and 100,000 sampling iterations, and using  
339 the birth-death sampler for exploring model space. We then used 10-fold cross-validation  
340 to assess the predictive power of these models (that is, the power of the model to explain

341 observations not used in fitting the model). Predictive power necessarily averages over  
342 uncertainty in covariate effects (including which covariates have non-zero effects), and was  
343 measured as the Pearson correlation (and squared Pearson correlation) between the observed  
344 and predicted caterpillar performance GEBVs. As a simpler metric of explanatory power (not  
345 predictive power), we estimated the coefficient of determination ( $r^2$ ) from a standard linear  
346 model that included only the subset of predictors (i.e., plant trait GEBVs) with posterior  
347 inclusions probabilities (PIPs) greater than 0.5 in the Bayesian model averaging analysis  
348 (importantly, here the same data were used to fit the model and assess its explanatory  
349 power). This was done with the `lm` function in R.

350         The random forest regression algorithm was similarly used to determine the influence  
351 of the plant trait GEBVs on the caterpillar performance GEBVs, while allowing for non-linear  
352 interactions among variables (Breiman, 2001). Random forest creates multiple regression  
353 trees and then outputs the importance of each predictor. The number of trees created was  
354 left at the default of 500, after determining that changing the number of trees from this  
355 number did not significantly reduce error. The number of variables randomly sampled at  
356 each split (`mtry`) and the number of terminal nodes (`nodesize`) were chosen to minimize  
357 OOB error by manually varying these parameters from one to 20 (all possible combinations  
358 were considered). To determine variable importance, the predictor of interest was varied and  
359 the percent change mean-squared error (%MSE) in predicting the out-of-bag (OOB) data  
360 was determined for each. Those with the greatest effect on %MSE are the most important  
361 predictor variables. Random Forest was run using `randomForest` package (version 4.6-12)  
362 in R (Liaw & Wiener, 2002). Random forest regression was run separately with each of the  
363 caterpillar performance GEBVs as the response and the GEBVs for plant traits as predictors.

## 364 Results

### 365 Variation in plant traits and caterpillar performance

366 We documented substantial phenotypic variation for all 32 traits assayed (e.g., Fig. 1a,c).  
367 Phenotypic correlations among traits were evident, particularly among leaf morphology traits  
368 (some of which are functions of each other; Fig. 1b) and among some IR chemical traits  
369 (Fig. S2). Caterpillar survival rates were initially high, with only nine of the 486 caterpillars  
370 (1.9%) dying within the first eight days; the mean survival time was 22.3 days (excluding  
371 caterpillars that pupated; Fig. 1d). But most caterpillars failed to pupate (448, or 92.2%),  
372 such that high mortality rates were observed between 20 and 30 days of larval development.  
373 Of the 38 caterpillars that did pupate, 11 eclosed as adults (29%) (several of the adults were  
374 deformed). Mean caterpillar weight at 8 and 16 days were 5.1 mg (s.d. = 2.5 mg, min. =  
375 0.04 mg, max. = 12.9 mg) and 17.7 mg (s.d. = 7.7 mg, min. = 3.02 mg, max. = 82.7 mg),  
376 respectively.

377 The 32 traits exhibited significant among-line variation, with the possible exception  
378 of survival to eclosion as adults (Table 2). The proportion of variation among lines ranged  
379 from 0.15 (SLA) to 0.59 (plant height) for the plant morphology traits, from 0.09 to 0.36  
380 for the plant IR traits, and from 0.05 (survival to eclosion) to 0.41 (16 day weight) for the  
381 caterpillar performance traits (Fig. S3). With the exception of survival to eclosion (restricted  
382 likelihood ratio test [RLRT],  $P = 0.059$ ), the null model of no among-line variance could be  
383 confidently rejected for all traits (RLRT, all  $P < 0.05$ , most  $P < 0.001$ ; Table 2).

### 384 Genetic architecture of plant and caterpillar traits

385 The *M. truncatula* SNP data explained a modest to substantial proportion of trait variation  
386 (Table S2, Fig. 2). On average, *M. truncatula* genetic variation accounted for a greater  
387 proportion of the variation in plant morphology traits (mean PVE = 0.40) than in IR traits



388 (mean PVE = 0.17) or caterpillar performance (mean PVE = 0.24; recall that PVE is similar  
389 to narrow-sense heritability). However, *M. truncatula* genetics explained a particularly large  
390 amount of the variation in *L. melissa* caterpillar 16-day weight (PVE = 0.41, 90% equal-tail  
391 probability intervals [ETPIs] = 0.34–0.49; this trait also exhibited high among-line variance,  
392 Table 2). Estimates of PVE were generally precise, such that the average width of the 90%  
393 ETPIs for these parameters (mean across traits) was 0.13 (range = 0.11–0.15). In contrast,  
394 our estimates of the number of genetic loci with measurable effects on each trait ( $n-\gamma$ ), and of  
395 the proportion of the PVE explained by those loci (PGE) were less certain; in particular, the  
396 average width of the 90% ETPIs for  $n-\gamma$  and PGE (a proportion) were 153.7 loci and 0.82,  
397 respectively (Table S2). Thus, uncertainty in these parameter estimates blurs differences in  
398 genetic architectures among traits suggested by the differences in parameter point estimates  
399 (compare Fig. 2 with Table S2). Genetic architecture parameter estimates for permuted  
400 (randomized) caterpillar performance data differed markedly from those for the actual data,  
401 most notably in terms of PVE. Whereas permutations of the survival to eclosion data did  
402 sometimes give modest estimates of PVE (the maximum was 0.12, 90% ETPIs = 0.06–0.19),  
403 these were still lower than the PVE estimate for the least heritable trait, namely survival to  
404 eclosion (PVE = 0.15, 90% ETPIs = 0.09–0.22), and most PVE estimates from permuted  
405 data were less than 0.05 (Fig. S4).

406 Consistent with the high (but uncertain) estimates of  $n-\gamma$  for most traits, many  
407 SNPs had small but non-zero posterior inclusion probabilities (PIPs) in the BSLMMs (Fig.  
408 S5). In other words, we were better able to detect than confidently isolate and localize  
409 the effects of individual genetic loci on the traits. There were a few exceptions to this  
410 pattern, most notably plant height and survival to eclosion. For plant height, one SNP  
411 each on chromosomes 5 and 7 had very high PIPs,  $\sim 1.0$  (Fig. S6). Two nearby SNPs on  
412 chromosome 6 were confidently associated with survival to eclosion, but given the unbalanced  
413 design (most caterpillars did not survive to eclosion) and the modest difference between PGE  
414 (and to a lesser extent PVE) estimates for this trait and permutations of this trait, we do

415 not interpret or discuss these associations with survival further. We next summarized the  
416 genomic distribution of genetic variants affecting each trait by estimating the number of  
417 QTL (or QTN) for each trait on each of the eight *M. truncatula* chromosomes (as in Santure  
418 *et al.*, 2015; Lucas *et al.*, 2018). This was done by summing the PIPs across all SNPs on  
419 each chromosome, and thus is analogous to the parameter  $n-\gamma$ , except that it refers to  
420 specific chromosomes rather than the whole genome (Guan & Stephens, 2011; Riesch *et al.*,  
421 2017; Lucas *et al.*, 2018). As these chromosomes vary little in size ( $\sim 35$  to 55 megabases),  
422 the number of QTL per chromosome should be similar across chromosomes if the traits  
423 are highly polygenic. Consistent with this prediction, evidence of putative QTL for most  
424 traits was not restricted to specific chromosomes but distributed relatively evenly among  
425 chromosomes (Figs. 3, S7).

## 426 **Relationship between plant trait genetics and caterpillar perfor-** 427 **mance**

428 Trait genetic covariances and correlations were high for some pairs or sets of traits (high  
429 genetic correlations imply pleiotropy or tight linkage of causal variants; Fig. 4). For example,  
430 genetic correlations among leaf length, width, area and dry weight were all  $r \geq 0.8$ . High,  
431 positive genetic correlations were also observed among the caterpillar performance traits,  
432 particularly 16-day weight, survival to pupation and survival to eclosion ( $r = 0.47$  to  $0.60$ ).  
433 Caterpillar performance traits also exhibited non-trivial genetic correlations with several  
434 plant traits, most notably with leaf toughness where genetic correlations ranged from  $-0.25$   
435 for 8 day weight (95% confidence intervals [CIs] =  $-0.43$  to  $-0.05$ ,  $P = 0.016$ ) to  $-0.39$  for  
436 16 day weight (95% CIs =  $-0.55$  to  $-0.21$ ,  $P < 0.001$ ; Fig. 4). Weaker, but still consistently  
437 negative genetic correlations were observed between caterpillar performance traits and both  
438 trichome density and plant height (Fig. S8). More generally, hierarchical clustering revealed  
439 sets or modules of traits with high (positive or negative) genetic correlations, particularly

440 for suites of IR spectra traits (Fig. S9).

441 Multiple regression models with Bayesian model averaging had some (albeit modest)  
442 predictive power, with correlations between observed and predicted caterpillar performance  
443 GEBVs ranging from  $r = 0.12$  for survival to pupation (i.e.,  $r^2 = 1.4\%$  of the variation in  
444 observed GEBVs explained by predictions) to  $r = 0.42$  for 8-day weight ( $r^2 = 17.6\%$  of the  
445 variation in the observed GEBVs explained by predictions; Fig. 5). The most important  
446 predictor for 8-day caterpillar weight was IR 892.38, followed by IR 1072.19 (IR traits are  
447 labeled by their wavelength in  $\text{cm}^{-1}$ ; Figs. 5, S10). In contrast, leaf toughness was the best  
448 predictor of the GEBVs for 16-day weight, survival to pupation and survival to eclosion;  
449 higher GEBVs for leaf toughness consistently and credibly predicted lower GEBVs for cater-  
450 pillar performance metrics. Leaf toughness was the only credible predictor of caterpillar  
451 survival (all other traits had PIPs  $< 0.5$ ), whereas leaf toughness and several IR traits (or  
452 more precisely the GEBVs for these traits) had credible effects on 16 day weight GEBVS  
453 (i.e., IR 998.34, IR 1104.64 and IR 892.38; Figs. 5, S10). Standard multiple regression models  
454 that included the most credible covariates (those with PIP  $> 0.5$ ; Fig. S10) explained 40.4%  
455 (8-day weight; covariates = IR 892.38 and IR 1072.19), 34.9% (16-day weight; covariates =  
456 leaf toughness, IR 998.34, IR 1004.64 and IR 892.38), 8.5% (survival to pupation; covariate =  
457 leaf toughness) and 12.1% (survival to eclosion; covariate = leaf toughness) of the variation  
458 in caterpillar performance GEBVs, with all included covariates having significant effects (all  
459  $P < 0.01$ ). Thus, models with the most important covariates explained a moderate amount  
460 of the variation in caterpillar performance GEBVs, but still less than 50% in all cases.

461 For 8-day caterpillar weight GEBVs, predictions from random forest regression ac-  
462 counted for 31.9% of out-of-bag (OOB) variance (OOB variance measures predictive perfor-  
463 mance) (`mtry = 18`, `nodesize = 2`). The most important predictor variables were IR 892.38,  
464 IR 985.1, and plant height (Fig. 6a). For 16-day caterpillar weight GEBVs, random forest  
465 explained 14.4% of the OOB variance (`mtry = 12`, `nodesize = 9`). The most important  
466 predictor variables in this case were leaf toughness, IR 1104.64, and IR 830.13 (Fig. 6b).

467 Only 5.3% of the OOB variance was explained for survival to eclosion, with leaf toughness  
468 and IR 830.13 being the most important traits (Fig. 6c). Graphical analyses of the random  
469 forest regression results suggested non-linear relationships between GEBVs for many of the  
470 top plant and caterpillar traits (Figs. 6d-f, S11 and S12). For example, the effects of IR  
471 892.38 and IR 985.1 on 8-day weight exhibited a strong interaction (a similar pattern held  
472 for many of the IR chemical features). In contrast, the effect of leaf toughness on 16-day  
473 weight was negative and nearly linear (tougher leaves were associated with lower weights),  
474 although there was evidence of an asymptote at higher values of leaf toughness. We failed to  
475 explain a non-zero proportion of the OOB variance in caterpillar survival to pupation with  
476 random forest regression, and thus results for this trait are not shown.

## 477 Discussion

478 Because the world is full of newly-formed host-parasite interactions (including plant-insect  
479 interactions involving consumptive herbivory; Nylin *et al.*, 2018), and because most novel  
480 host plants are relatively sub-optimal hosts (Yoon & Read, 2016), the results reported here  
481 are of interest not only as a step towards understanding the interaction between *L. melissa*  
482 and *M. sativa* (discussed further below), but also as a more general model for the formation  
483 of host-parasite interactions. In addition, genetic dissections of plant-insect interactions are  
484 important not only for understanding the complexity underlying the formation and persis-  
485 tence of new associations, but also for understanding the evolution of plant defensive traits  
486 and phytochemical diversity in terrestrial ecosystems. In our study, genetic variation within  
487 *M. truncatula* explained a non-trivial proportion of the variation in *L. melissa* caterpillar  
488 performance traits, especially 16-day weight (PVE = 0.41) and survival to pupation (PVE  
489 = 0.31). Estimates of the variance in plant and caterpillar traits explained (PVE) by plant  
490 genetic variation were similar, meaning the two sets of traits were (on average) similarly  
491 heritable with respect to *M. truncatula* (this suggests these caterpillar performance traits

492 can meaningfully be viewed as extended phenotypes of *M. truncatula*, *sensu* Dawkins, 1982;  
493 see also, e.g., Whitham *et al.*, 2006).

494 Genomic estimated breeding values (GEBVs) for caterpillar performance traits were  
495 most consistently and strongly associated with GEBVs for leaf toughness, with more mod-  
496 est or idiosyncratic correlations with several IR chemical features (e.g., IR 892.38 and IR  
497 1104.64), trichome density, and plant height. These genetic correlations suggest either that  
498 caterpillar performance and several of these plant traits are affected by some of the same  
499 segregating genetic variants (i.e., pleiotropy), or that modest to high LD exists among ge-  
500 netic variants affecting the plant traits and caterpillar performance. Such high LD would  
501 imply tight linkage among many genetic variants, or some alternative process or mechanism  
502 for suppressed recombination among genotypes (this could include low rates of gene flow  
503 among the natural source populations from which these lines were derived). However, LD  
504 is modest and decays with a few kbs to background levels in this mapping population (i.e.,  
505 mean LD, measured by  $r^2$  drops below 0.2 within 20 kbs; Branca *et al.*, 2011). Interest-  
506 ingly, the additive effects of alleles on the measured plant traits (as captured by the trait  
507 GEBVs) were able to explain or account for the additive effects of *M. truncatula* alleles on  
508 caterpillar performance, at least to a modest extent (as expected, explanatory power was  
509 lower for cross-validation than in simple linear models). Nonetheless, much of the variation  
510 in caterpillar performance GEBVs was not accounted for by the plant trait GEBVs. This  
511 implies additional plant traits (and underlying genes) likely contribute to the total variation  
512 in caterpillar performance explained by plant genetics. We discuss these results in more  
513 detail below.

## 514 **The genetic architecture of traits associated with a plant-insect** 515 **interaction**

516 Our results were consistent with standing genetic variation at many loci in *M. truncatula*  
517 for *L. melissa* caterpillar performance on *M. truncatula*. Specifically, estimates of PVE  
518 from the BSLMMs and REML estimates of the among plant-line genetic variances provide  
519 direct evidence of standing polygenic variation in *M. truncatula* for *L. melissa* caterpillar  
520 performance. Furthermore, results from the BSLMMs suggest multiple QTL for caterpillar  
521 performance are dispersed across the eight *M. truncatula* chromosomes rather than localized  
522 in one or a few regions of the genome. A polygenic basis for caterpillar performance (as a  
523 plant trait) was also detected in a recent genomic study of *Pieris rapae* caterpillars reared  
524 on *Arabidopsis thaliana* (Nallu *et al.*, 2018). In this study, Nallu *et al.* (2018) identified 12  
525 *A. thaliana* genes associated with variation in *P. rapae* performance (weight gain over 72  
526 hours), which included CYP79B2, a cytochrome P450 gene known to affect plant resistance  
527 to insects. A genome-wide transcriptomic response to herbivory (and even to oviposition)  
528 was detected as well.

529 More generally, genetic variation for resistance to insects has been documented in  
530 numerous other plant species, especially crops (Via, 1990; Schoonhoven *et al.*, 2010), although  
531 mostly without genome-scale data and without explicit links to plant traits. Still, these  
532 studies show that intraspecific variation in plant resistance to insects is often highly heritable,  
533 and that it can involve one or many genes (reviewed in Schoonhoven *et al.*, 2010). The  
534 same plant species can even exhibit polygenic resistance variation with respect to one insect  
535 species and monogenic resistance variation with respect to another (Kennedy & Barbour,  
536 1992). Thus, while our finding of a polygenic architecture is not unexpected given the  
537 complex, multifaceted nature of caterpillar performance (Allen *et al.*, 2010; Rockman, 2012),  
538 additional genomic studies are needed for a more robust assessment of the prevalence and  
539 consistency of this pattern (especially in natural systems).

540 The full set of plant and caterpillar traits we measured exhibited a range of heritabil-  
541 ities, yet, with the possible exception of plant height, we found little evidence of major effect  
542 loci. Instead the traits appeared to be controlled by many loci. Genome-wide association  
543 mapping methods (and to a lesser extent genomic prediction methods) are known to suffer  
544 from a failure to detect many small effect variants (Eichler *et al.*, 2010; Yang *et al.*, 2010),  
545 and from overestimating the effects of large effect variants (i.e., the Beavis effect; Beavis,  
546 1998). However, major-effect loci are less likely to be missed. This is true in general as  
547 such loci are easier to detect even with small sample sizes, but especially true here given  
548 the high-density genome-wide SNP data set we used (>five million SNPs, or about one per  
549 100 bps) and thus the high likelihood of LD between at least one of our SNPs and most  
550 causal variants. Moreover, two of the plant traits we analyzed, plant height and trichome  
551 density, were independently mapped and analyzed in an earlier study of the *M. truncat-*  
552 *ula* HapMap mapping population (albeit with a different subset of lines) (Stanton-Geddes  
553 *et al.*, 2013). Results from Stanton-Geddes *et al.* (2013) and our results were remarkably  
554 consistent, with, for example, 58% versus 59% (plant height) and 45% versus 49% (trichome  
555 density) of the trait variation partitioned among lines in Stanton-Geddes *et al.* (2013) ver-  
556 sus our study, respectively. This is reassuring, particularly given the variability frequently  
557 observed in genetic mapping and quantitative genetic results among mapping populations  
558 and environments (e.g., Weinig *et al.*, 2002, 2003; Weiss, 2008). However, the use of inbred  
559 lines sampled from many localities necessarily distorts the frequencies and possibly average  
560 effects of genetic variants on traits, thus our results do not rule out major-effect loci for these  
561 traits in natural populations.

## 562 Evidence of pleiotropic effects across species, and of variance left 563 unexplained

564 The estimated genetic correlations are consistent with either pleiotropic effects of *M. trun-*  
565 *catula* alleles on plant traits and caterpillar performance, or with LD among variants that  
566 independently affect subsets of these traits (parsing these two possibilities is very difficult,  
567 and at the extreme, very tight linkage can be functionally equivalent to pleiotropy). Leaf  
568 toughness, and to a lesser extent, trichome density and plant height, exhibited some of the  
569 greatest and most consistent negative genetic correlations with *L. melissa* performance. Leaf  
570 toughness and trichome density constitute structural (physical) plant defenses (Levin, 1973;  
571 Schoonhoven *et al.*, 2010), and our results thus support recent calls for greater attention to  
572 structural (as opposed to chemical) plant defenses (Hanley *et al.*, 2007; Carmona *et al.*, 2011;  
573 Malishev & Sanson, 2015). However, some IR chemical features exhibited high genetic corre-  
574 lations with some or many of the caterpillar performance traits. This is consistent with a role  
575 for intraspecific variation in phytochemical defenses in *M. truncatula* as well, although the  
576 IR chemical features could also reflect variation in plant nutritional composition rather than  
577 chemical defenses *per se*. Future work should identify the molecules underlying variation at  
578 the leading IR chemical features (e.g., IR 892.38 and IR 1104.64).

579 Plant trait GEBVs accounted for a moderate amount of the variation in caterpillar  
580 weight GEBVs, but relatively little of the variation in caterpillar survival GEBVs. In other  
581 words, our results suggest that the alleles affecting the measured plant traits accounted for  
582 a greater proportion of the heritable variation in *M. truncatula* for caterpillar weight than  
583 caterpillar survival. Nonetheless, in no cases did the variance explained or predictive power of  
584 these models approach 100%. In fact, the highest percent variance explained was 40.8%, and  
585 predictive power never exceeded 17.6% for the Bayesian multiple regression or 31.9% for the  
586 random forest regression. This means that the effects of *M. truncatula* alleles on caterpillar  
587 performance are not fully accounted for by the effects of these alleles on the measured plant



588 traits. Additional heritable plant traits not measured in this study must affect *L. melissa*  
589 performance, and additional work will be required to identify these. Obvious candidates  
590 include defensive phytochemicals or plant nutrients that were not captured by the IR assays.  
591 Still, even the modest predictive power of these models allows us to conclude, for example,  
592 that the genetic quality of a plant in terms of caterpillar performance can be predicted in  
593 part from the additive effects of plant alleles on leaf toughness.

594 As expected, the plant traits most important in these predictive models tended to  
595 be the ones with the largest genetic correlations with caterpillar performance. However,  
596 there were a few exceptions that arose because of correlations among the plant trait GEBVs,  
597 which rendered a subset of these traits (e.g., trichome density) unimportant in the predictive  
598 models. Moreover, the relative ranks of plant traits in terms of their importance (i.e.,  
599 Bayesian model-averaged effect estimates or percent reduction in MSE) differed between the  
600 Bayesian multiple regression models and random forest regression. We think these differences  
601 were most evident in cases where random forest regression identified extreme interactions  
602 among plant trait GEBVs or non-linear relationships between GEBVs for the plant traits  
603 and caterpillar performance (e.g., IR 985.1 on 8-day caterpillar weight), as these would not  
604 be captured by the Bayesian multiple regression models.

## 605 **Conclusions and future directions**

606 We have shown that plant genetic variation can have a substantial effect on the outcome  
607 of a plant-insect interaction, specifically on whether *L. melissa* caterpillars can develop  
608 successfully on *M. truncatula*. Genetic variation among *M. truncatula* plants explained  
609 about as much of the variance in caterpillar performance in the current study (9-41%) as  
610 genetic variation among *L. melissa* caterpillars did in an earlier rearing experiment on *M.*  
611 *sativa* (7-57%) (Gompert *et al.*, 2015). This suggests that caterpillar and plant genetic  
612 variation combined could explain a large proportion (i.e., over half) of the variation in  
613 larval performance, which is necessarily a key aspect of the interaction between plants and

614 herbivorous insects. However, *M. truncatula* and *M. sativa* are not identical, and it remains  
615 to be seen whether similar levels of genetic variation for performance exist in this actual  
616 (rather than potential) *L. melissa* host plant. Moreover, gene by gene epistatic interactions  
617 between *L. melissa* alleles and *M. sativa* (or *M. truncatula*) alleles could modulate the  
618 total variance in performance explained for the pair of species (in other words, the trait  
619 heritabilities with respect to plant and insect genes are not necessarily additive).

620         Ultimately, we want to accurately predict the mosaic patterns of host use and host  
621 adaption in *L. melissa* from a mechanistic understanding of the factors affecting host use. We  
622 have reasons to be both optimistic and pessimistic about this aim. Past work on *L. melissa*  
623 has shown that genetic variants associated with performance in the lab covary significantly  
624 with host use in nature (Gompert *et al.*, 2015; Chaturvedi *et al.*, 2018). Thus, genetic vari-  
625 ants affecting performance in the lab appear to also be associated with host-plant adaptation  
626 in nature. On the other hand, the lab environment is necessarily simplified and lacks inter-  
627 actions with predators, competitors and mutualists that could be important determinants of  
628 host use in the wild. For example, survival of *L. melissa* caterpillars on *M. sativa* in a field  
629 experiment depended on the presence of ants that defend the caterpillars from predators  
630 (this is a facultative relationship where the ants receive a sugar reward from the caterpillars;  
631 Forister *et al.*, 2011). Even ignoring such complexities, the relevance of genetic and trait  
632 variation in *M. truncatula* for understanding genetic and trait variation in *M. sativa* is not  
633 certain. Leaf toughness, which was most strongly associated with performance in the current  
634 experiment, exhibits a similar range of variation in *M. sativa* and *M. truncatula* (albeit with  
635 somewhat tougher leaves in *M. sativa* on average; Harrison *et al.*, 2018). This suggests vari-  
636 ation in leaf toughness in *M. sativa* could have a similar affect on caterpillar performance.  
637 In the end, we may fail to generate reliable predictions about host use in nature from simple  
638 lab experiments, but nonetheless might advance scientific understanding of the importance  
639 of intraspecific variation for the evolution and ecology of plant-insect interactions by gaining  
640 a better understanding of how and why these predictions fail.

## 641 **Acknowledgments**

642 We thank Shaylen Fidel, Camden Treat, Marissa Kee and Kenneth Tache for their help with  
643 the caterpillar rearing experiment, and Marianne Harris for use of greenhouse space and help  
644 caring for the plants. Chris Nice, James Fordyce, Alex Buerkle and Amy Springer provided  
645 valuable comments on an earlier draft of this manuscript. This research was funded by the  
646 National Science Foundation (DEB-1638768 to ZG and DEB-1638793 to MLF), and by the  
647 Utah Agricultural Experiment Station (paper no. XXX). The support and resources from  
648 the Center for High Performance Computing at the University of Utah are also gratefully  
649 acknowledged.

## References

- 650
- 651 Allen HL, Estrada K, Lettre G, *et al.* (2010) Hundreds of variants clustered in genomic loci  
652 and biological pathways affect human height. *Nature*, **467**, 832–838.
- 653 Bates D, Mächler M, Bolker B, Walker S (2015) Fitting linear mixed-effects models using  
654 lme4. *Journal of Statistical Software*, **67**, 1–48.
- 655 Beavis WD (1998) QTL analyses: power, precision, and accuracy. In: *Molecular Dissection*  
656 *of Complex Traits* (ed. Patterson AH), pp. 145–162, CRC Press, New York.
- 657 Berenbaum MR, Zangerl AR (1998) Chemical phenotype matching between a plant and its  
658 insect herbivore. *Proceedings of the National Academy of Sciences*, **95**, 13743–13748.
- 659 Bolnick DI, Svanbäck R, Fordyce JA, *et al.* (2002) The ecology of individuals: incidence and  
660 implications of individual specialization. *The American Naturalist*, **161**, 1–28.
- 661 Braga MP, Guimaraes PR, Wheat CW, Soren N, Janz N (2018) Unifying host-associated  
662 diversification processes using butterfly-plant networks. *Nature Communications*, **9**, 5155.
- 663 Branca A, Paape TD, Zhou P, *et al.* (2011) Whole-genome nucleotide diversity, recombina-  
664 tion, and linkage disequilibrium in the model legume *Medicago truncatula*. *Proceedings of*  
665 *the National Academy of Sciences*, **108**, E864–E870.
- 666 Breiman L (2001) Random forests. *Machine Learning*, **45**, 5–32.
- 667 Carius HJ, Little TJ, Ebert D (2001) Genetic variation in a host-parasite association: po-  
668 tential for coevolution and frequency-dependent selection. *Evolution*, **55**, 1136–1145.
- 669 Carmona D, Lajeunesse MJ, Johnson MT (2011) Plant traits that predict resistance to  
670 herbivores. *Functional Ecology*, **25**, 358–367.

- 671 Chaturvedi S, Lucas LK, Nice CC, Fordyce JA, Forister ML, Gompert Z (2018) The pre-  
672 dictability of genomic changes underlying a recent host shift in Melissa blue butterflies.  
673 *Molecular Ecology*, **27**, 2651–2666.
- 674 Choi HK, Kim D, Uhm T, *et al.* (2004a) A sequence-based genetic map of *Medicago truncatula*  
675 and comparison of marker colinearity with *M. sativa*. *Genetics*, **166**, 1463–1502.
- 676 Choi HK, Mun JH, Kim DJ, *et al.* (2004b) Estimating genome conservation between crop  
677 and model legume species. *Proceedings of the National Academy of Sciences of the United*  
678 *States of America*, **101**, 15289–15294.
- 679 Costa FR, Lang C, Almeida DR, Castilho CV, Poorter L (2018) Near-infrared spectrometry  
680 allows fast and extensive predictions of functional traits from dry leaves and branches.  
681 *Ecological Applications*.
- 682 Cox GW (2004) *Alien species and evolution: the evolutionary ecology of exotic plants, ani-*  
683 *mals, microbes, and interacting native species*. Island Press.
- 684 Crainiceanu CM, Ruppert D (2004) Likelihood ratio tests in linear mixed models with one  
685 variance component. *Journal of the Royal Statistical Society: Series B (Statistical Method-*  
686 *ology)*, **66**, 165–185.
- 687 Crutsinger GM, Collins MD, Fordyce JA, Gompert Z, Nice CC, Sanders NJ (2006) Plant  
688 genotypic diversity predicts community structure and governs an ecosystem process. *Sci-*  
689 *ence*, **313**, 966–968.
- 690 Dambroski HR, Linn Jr C, Berlocher SH, Forbes AA, Roelofs W, Feder JL (2005) The genetic  
691 basis for fruit odor discrimination in *Rhagoletis* flies and its significance for sympatric host  
692 shifts. *Evolution*, **59**, 1953–1964.
- 693 Danecek P, Auton A, Abecasis G, *et al.* (2011) The variant call format and vcftools. *Bioin-*  
694 *formatics*, **27**, 2156–2158.

- 695 Dawkins R (1982) *The Extended Phenotype*. Oxford University Press.
- 696 Edger PP, Heidel-Fischer HM, Bekaert M, *et al.* (2015) The butterfly plant arms-race esca-  
697 lated by gene and genome duplications. *Proceedings of the National Academy of Sciences*,  
698 p. 201503926.
- 699 Ehrlich PR, Raven PH (1964) Butterflies and plants: a study in coevolution. *Evolution*, **18**,  
700 586–608.
- 701 Eichler EE, Flint J, Gibson G, *et al.* (2010) Missing heritability and strategies for finding  
702 the underlying causes of complex disease. *Nature Reviews Genetics*, **11**, 446–450.
- 703 Farkas TE, Mononen T, Comeault AA, Hanski I, Nosil P (2013) Evolution of camouflage  
704 drives rapid ecological change in an insect community. *Current Biology*, **23**, 1835–1843.
- 705 Foley WJ, McIlwee A, Lawler I, Aragones L, Woolnough AP, Berding N (1998) Ecological  
706 applications of near infrared reflectance spectroscopy—a tool for rapid, cost-effective pre-  
707 diction of the composition of plant and animal tissues and aspects of animal performance.  
708 *Oecologia*, **116**, 293–305.
- 709 Fordyce JA (2010) Host shifts and evolutionary radiations of butterflies. *Proceedings of the*  
710 *Royal Society of London, Series B*, **277**, 3735–3743.
- 711 Forister ML, Dyer LA, Singer MS, Stireman III JO, Lill JT (2012) Revisiting the evolution of  
712 ecological specialization, with emphasis on insect–plant interactions. *Ecology*, **93**, 981–991.
- 713 Forister ML, Gompert Z, Nice CC, Forsiter GW, Fordyce JA (2011) Ant association facili-  
714 tates the evolution of diet breadth in a Lycaenid butterfly. *Proceeding of the Royal Society*  
715 *B.*, **278**, 1539–1547.
- 716 Forister ML, Nice CC, Fordyce JA, Gompert Z (2009) Host range evolution is not driven  
717 by the optimization of larval performance: the case of *Lycaeides melissa* (Lepidoptera:  
718 Lycaenidae) and the colonization of alfalfa. *Oecologia*, **160**, 551–561.

- 719 Forister ML, Novotny V, Panorska AK, *et al.* (2015) The global distribution of diet breadth  
720 in insect herbivores. *Proceedings of the National Academy of Sciences*, **112**, 442–447.
- 721 Forister ML, Scholl CF, Jahner JP, *et al.* (2013) Specificity, rank preference, and the colo-  
722 nization of a non-native host plant by the Melissa blue butterfly. *Oecologia*, **172**, 177–188.
- 723 Gompert Z, Egan SP, Barrett RD, Feder JL, Nosil P (2017) Multilocus approaches for the  
724 measurement of selection on correlated genetic loci. *Molecular Ecology*, **26**, 365–382.
- 725 Gompert Z, Fordyce JA, Forister ML, Nice CC (2008) Recent colonization and radiation of  
726 North American *Lycaeides* (*Plebejus*) inferred from mtDNA. *Molecular Phylogenetics and*  
727 *Evolution*, **48**, 481–490.
- 728 Gompert Z, Jahner JP, Scholl CF, *et al.* (2015) The evolution of novel host use is unlikely to  
729 be constrained by trade-offs or a lack of genetic variation. *Molecular Ecology*, **24**, 2777–  
730 2793.
- 731 Greven S, Crainiceanu CM, Küchenhoff H, Peters A (2008) Restricted likelihood ratio test-  
732 ing for zero variance components in linear mixed models. *Journal of Computational and*  
733 *Graphical Statistics*, **17**, 870–891.
- 734 Guan Y, Stephens M (2011) Bayesian variable selection regression for genome-wide associa-  
735 tion studies and other large-scale problems. *Annals of Applied Statistics*, **5**, 1780–1815.
- 736 Hanley ME, Lamont BB, Fairbanks MM, Rafferty CM (2007) Plant structural traits and their  
737 role in anti-herbivore defence. *Perspectives in Plant Ecology, Evolution and Systematics*,  
738 **8**, 157–178.
- 739 Harrison JG, Gompert Z, Fordyce JA, *et al.* (2016) The many dimensions of diet breadth:  
740 Phytochemical, genetic, behavioral, and physiological perspectives on the interaction be-  
741 tween a native herbivore and an exotic host. *PloS ONE*, **11**, e0147971.

- 742 Harrison JG, Philbin CS, Gompert Z, *et al.* (2018) Deconstruction of a plant-arthropod  
743 community reveals influential plant traits with nonlinear effects on arthropod assemblages.  
744 *Functional Ecology*, **32**, 1317–1328.
- 745 Hayes B, Bowman P, Chamberlain A, Goddard M (2009) Genomic selection in dairy cattle:  
746 Progress and challenges. *Journal of Dairy Science*, **92**, 433–443.
- 747 Hendry AP (2016) *Eco-evolutionary dynamics*. Princeton University Press.
- 748 Kang Y, Sakiroglu M, Krom N, *et al.* (2015) Genome-wide association of drought-related and  
749 biomass traits with hapmap SNPs in *Medicago truncatula*. *Plant, Cell & Environment*, **38**,  
750 1997–2011.
- 751 Kennedy GG, Barbour JD (1992) *Plant resistance to herbivores and pathogens: ecology,*  
752 *evolution, and genetics*, chap. Resistance variation in natural and managed systems, pp.  
753 13–41. University of Chicago Press, Chicago.
- 754 Lankau RA (2012) Coevolution between invasive and native plants driven by chemical compe-  
755 tition and soil biota. *Proceedings of the National Academy of Sciences*, **109**, 11240–11245.
- 756 Levin DA (1973) The role of trichomes in plant defense. *The Quarterly Review of Biology*,  
757 **48**, 3–15.
- 758 Li H, Handsaker B, Wysoker A, *et al.* (2009) The Sequence Alignment/Map format and  
759 SAMtools. *Bioinformatics*, **25**, 2078–2079.
- 760 Li W, Schuler MA, Berenbaum MR (2003) Diversification of furanocoumarin-metabolizing  
761 cytochrome P450 monooxygenases in two papilionids: specificity and substrate encounter  
762 rate. *Proceedings of the National Academy of Sciences*, **100**, 14593–14598.
- 763 Liaw A, Wiener M (2002) Classification and regression by `randomforest`. *R news*, **2**, 18–22.



- 764 Lucas LK, Nice CC, Gompert Z (2018) Genetic constraints on wing pattern variation in  
765 *Lycaeides* butterflies: A case study on mapping complex, multifaceted traits in structured  
766 populations. *Molecular Ecology Resources*, **18**, 892–907.
- 767 Luijckx P, Ben-Ami F, Mouton L, Du Pasquier L, Ebert D (2011) Cloning of the uncultur-  
768 able parasite *Pasteuria ramosa* and its *Daphnia* host reveals extreme genotype–genotype  
769 interactions. *Ecology Letters*, **14**, 125–131.
- 770 Luijckx P, Fienberg H, Duneau D, Ebert D (2013) A matching-allele model explains host  
771 resistance to parasites. *Current Biology*, **23**, 1085–1088.
- 772 Malishev M, Sanson GD (2015) Leaf mechanics and herbivory defence: how tough tissue  
773 along the leaf body deters growing insect herbivores. *Austral Ecology*, **40**, 300–308.
- 774 Mandeville EG, Parchman TL, Thompson KG, *et al.* (2017) Inconsistent reproductive isola-  
775 tion revealed by interactions between catostomus fish species. *Evolution Letters*, **1**, 255–  
776 268.
- 777 McKenna A, Hanna M, Banks E, *et al.* (2010) The Genome Analysis Toolkit: A MapReduce  
778 framework for analyzing next-generation DNA sequencing data. *Genome Research*, **20**,  
779 1297–1303.
- 780 Meuwissen THE, Hayes B, Goddard M (2001) Prediction of total genetic value using genome-  
781 wide dense marker maps. *Genetics*, **157**, 1819–1829.
- 782 Michaud R, Lehman WF, Rumbaugh MD (1988) World distribution and historical devel-  
783 opments. In: *Alfalfa and Alfalfa improvement* (eds. Hanson AA, Barnes DK, Hill RR),  
784 vol. 29, chap. World distribution and historical developments, Madison.
- 785 Milborrow S (2018) `plotmo`: *Plot a Model's Residuals, Response, and Partial Dependence*  
786 *Plots*. R package version 3.5.1.

- 787 Mitchell C, Brennan RM, Graham J, Karley AJ (2016) Plant defense against herbivorous  
788 pests: exploiting resistance and tolerance traits for sustainable crop protection. *Frontiers*  
789 *in plant science*, **7**, 1132.
- 790 Mitter C, Farrell B, Wiegmann B (1988) The phylogenetic study of adaptive zones: has  
791 phytophagy promoted insect diversification? *The American Naturalist*, **132**, 107–128.
- 792 Moreau D (2006) Morphology, development and plant architecture of *M. truncatula*. In: *The*  
793 *Medicago truncatula handbook*, INRA.
- 794 Nallu S, Hill JA, Don K, *et al.* (2018) The molecular genetic basis of herbivory between  
795 butterflies and their host plants. *Nature Ecology & Evolution*, **2**, 1418.
- 796 Nosil P (2004) Reproductive isolation caused by visual predation on migrants between di-  
797 vergent environments. *Proceedings of the Royal Society of London Series B-Biological Sci-*  
798 *ences*, **271**, 1521–1528.
- 799 Nosil P, Villoutreix R, de Carvalho CF, *et al.* (2018) Natural selection and the predictability  
800 of evolution in *Timema* stick insects. *Science*, **359**, 765–770.
- 801 Nouhaud P, Gautier M, Gouin A, *et al.* (2018) Identifying genomic hotspots of differentiation  
802 and candidate genes involved in the adaptive divergence of pea aphid host races. *Molecular*  
803 *Ecology*, **27**, 3287–3300.
- 804 Nylin S, Agosta S, Bensch S, *et al.* (2018) Embracing colonizations: a new paradigm for  
805 species association dynamics. *Trends in Ecology & Evolution*, **33**, 4–14.
- 806 Ober U, Ayroles JF, Stone EA, *et al.* (2012) Using whole-genome sequence data to predict  
807 quantitative trait phenotypes in *Drosophila melanogaster*. *PLoS Genetics*, **8**, e1002685.
- 808 Ordas B, Malvar RA, Santiago R, Sandoya G, Romay MC, Butron A (2009) Mapping of  
809 QTL for resistance to the mediterranean corn borer attack using the intermated B73×  
810 Mo17 (IBM) population of maize. *Theoretical and Applied Genetics*, **119**, 1451–1459.

- 811 Purcell S, Neale B, Todd-Brown K, *et al.* (2007) PLINK: a tool set for whole-genome associ-  
812 ation and population-based linkage analyses. *The American Journal of Human Genetics*,  
813 **81**, 559–575.
- 814 Ramirez JA, Posada JM, Handa IT, *et al.* (2015) Near-infrared spectroscopy (NIRS) predicts  
815 non-structural carbohydrate concentrations in different tissue types of a broad range of  
816 tree species. *Methods in Ecology and Evolution*, **6**, 1018–1025.
- 817 Rausher MD, Simms EL (1989) The evolution of resistance to herbivory in *Ipomoea purpurea*.  
818 I. attempts to detect selection. *Evolution*, **43**, 563–572.
- 819 Riesch R, Muschick M, Lindtke D, *et al.* (2017) Transitions between phases of genomic  
820 differentiation during stick-insect speciation. *Nature Ecology & Evolution*, **1**, 0082.
- 821 Rockman MV (2012) The QTN program and the alleles that matter for evolution: All that’s  
822 gold does not glitter. *Evolution*, **66**, 1–17.
- 823 Santure AW, Poissant J, De Cauwer I, *et al.* (2015) Replicated analysis of the genetic ar-  
824 chitecture of quantitative traits in two wild great tit populations. *Molecular Ecology*, **24**,  
825 6148–6162.
- 826 Scheipl F, Greven S, Kuechenhoff H (2008) Size and power of tests for a zero random effect  
827 variance or polynomial regression in additive and linear mixed models. *Computational*  
828 *Statistics & Data Analysis*, **52**, 3283–3299.
- 829 Schoonhoven LM, van Loon JJA, Dicke M (2010) *Insect-Plant Biology*. 2nd edn., Oxford  
830 University Press.
- 831 Scott J (1986) *The Butterflies of North America: A Natural History and Field Guide*. Stan-  
832 ford University Press.
- 833 Soria-Carrasco V, Gompert Z, Comeault AA, *et al.* (2014) Stick insect genomes reveal natural  
834 selection’s role in parallel speciation. *Science*, **344**, 738–742.

- 835 Stanton-Geddes J, Paape T, Epstein B, *et al.* (2013) Candidate genes and genetic architecture  
836 of symbiotic and agronomic traits revealed by whole-genome, sequence-based association  
837 genetics in *Medicago truncatula*. *PloS ONE*, **8**, e65688.
- 838 Stowe KA (1998) Realized defense of artificially selected lines of *Brassica rapa*: effects of  
839 quantitative genetic variation in foliar glucosinolate concentration. *Environmental Ento-*  
840 *mology*, **27**, 1166–1174.
- 841 Strauss SY, Lau JA, Carroll SP (2006) Evolutionary responses of natives to introduced  
842 species: what do introductions tell us about natural communities? *Ecology Letters*, **9**,  
843 357–374.
- 844 Thompson JN (2013) *Relentless Evolution*. University of Chicago Press.
- 845 Via S (1990) Ecological genetics and host adaptation in herbivorous insects: the experimental  
846 study of evolution in natural and agricultural systems. *Annual Review of Entomology*, **35**,  
847 421–446.
- 848 Vila R, Bell CD, Macniven R, *et al.* (2011) Phylogeny and palaeoecology of *Polyommata*-  
849 *tus* blue butterflies show Beringia was a climate-regulated gateway to the New World.  
850 *Proceedings of the Royal Society B: Biological Sciences*, **278**, 2737–2744.
- 851 Weinig C, Stinchcombe J, Schmitt J (2003) QTL architecture of resistance and tolerance  
852 traits in *Arabidopsis thaliana* in natural environments. *Molecular Ecology*, **12**, 1153–1163.
- 853 Weinig C, Ungerer M, Dorn L, *et al.* (2002) Novel loci control variation in reproductive  
854 timing in *Arabidopsis thaliana* in natural environments. *Genetics*, **162**, 1875–1884.
- 855 Weiss KM (2008) Tilting at quixotic trait loci (QTL): an evolutionary perspective on genetic  
856 causation. *Genetics*, **179**, 1741–1756.
- 857 Wen Z, Rupasinghe S, Niu G, Berenbaum MR, Schuler MA (2006) CYP6B1 and CYP6B3 of

- 858 the black swallowtail (*Papilio polyxenes*): adaptive evolution through subfunctionalization.  
859 *Molecular Biology and Evolution*, **23**, 2434–2443.
- 860 Wheat CW, Vogel H, Wittstock U, Braby MF, Underwood D, Mitchell-Olds T (2007) The  
861 genetic basis of a plant–insect coevolutionary key innovation. *Proceedings of the National*  
862 *Academy of Sciences*, **104**, 20427–20431.
- 863 Whitham T, Bailey J, Schweitzer J, *et al.* (2006) A framework for community and ecosystem  
864 genetics: from genes to ecosystems. *Nature Reviews Genetics*, **7**, 510–523.
- 865 Yang J, Benyamin B, McEvoy BP, *et al.* (2010) Common SNPs explain a large proportion  
866 of the heritability for human height. *Nature Genetics*, **42**, 565–569.
- 867 Yoon S, Read Q (2016) Consequences of exotic host use: impacts on Lepidoptera and a test  
868 of the ecological trap hypothesis. *Oecologia*, **181**, 985–996.
- 869 Young ND, Debelle F, Oldroyd GE, *et al.* (2011) The *Medicago* genome provides insight into  
870 the evolution of rhizobial symbioses. *Nature*, **480**, 520.
- 871 Young ND, Udvardi M (2009) Translating *Medicago truncatula* genomics to crop legumes.  
872 *Current Opinion in Plant Biology*, **12**, 193 – 201, genome Studies and Molecular Genetics.
- 873 Zellner A (1986) On assessing prior distributions and bayesian regression analysis with g-  
874 prior distributions. *Bayesian inference and decision techniques*.
- 875 Zeugner S, Feldkircher M (2015) Bayesian model averaging employing fixed and flexible  
876 priors: The BMS package for R. *Journal of Statistical Software*, **68**, 1–37.
- 877 Zhou X, Carbonetto P, Stephens M (2013) Polygenic modeling with Bayesian sparse linear  
878 mixed models. *PLoS Genetics*, **9**, e1003264.

## 879 **Data Accessibility**

880 All original data and scripts will be deposited on Dryad.

## 881 **Author Contributions**

882 ZG, LKL and MB designed the study. ZG, LKL, MB, FZ, CP, MJT and MLF conducted the  
883 experiment. ZG, FC, CP and TS analyzed the data. ZG, CP and TS wrote the manuscript.

884 All authors revised and edited the manuscript.

## 885 Tables and Figures

Table 1: Plant traits along with our predictions about their primary functional roles and relationships with caterpillar performance. We are presenting simplified predictions to guide interpretation, but are aware that the traits potentially have multifaceted relationships to growth and defense. ↗ denotes a positive correlation with caterpillar performance, whereas ↘ denotes a negative relationship with caterpillar performance. Our classification of SLA is based on its general association with mechanical properties of leaves, including work to shear, tear and penetrate (reviewed in Hanley *et al.*, 2007). All 19 IR chemical features are treated together here, and thus we predict that they include a mixture of features associated with vigor (↗) and defense (↘). Leaf shape is not included in the table, as its putative function and effects are not known.

| Traits        | Primary putative function | Predicted relationship with caterpillar performance |
|---------------|---------------------------|-----------------------------------------------------|
| Leaf length   | Growth                    | ↗                                                   |
| Leaf width    | Growth                    | ↗                                                   |
| Leaf area     | Growth                    | ↗                                                   |
| Leaf weight   | Growth                    | ↗                                                   |
| SLA           | Defense                   | ↘                                                   |
| Trichome den. | Defense                   | ↘                                                   |
| Leaf tough.   | Defense                   | ↘                                                   |
| Plant height  | Growth                    | ↗                                                   |
| IR features   | Growth or defense         | ↗ or ↘                                              |

Table 2: REML estimates for each trait of the proportion of phenotypic variation found among *M. truncatula* lines ('Prop. var.'). Test statistics (LR = likelihood ratios) and *P*-values from the null hypothesis test of no line effect are reported.

| Traits         | Prop. var. | LR     | <i>P</i> |
|----------------|------------|--------|----------|
| Leaf length    | 0.43       | 115.87 | <0.001   |
| Leaf width     | 0.49       | 144.78 | <0.001   |
| Leaf area      | 0.49       | 147.90 | <0.001   |
| Leaf shape     | 0.21       | 32.23  | <0.001   |
| Leaf weight    | 0.41       | 102.49 | <0.001   |
| SLA            | 0.15       | 17.12  | <0.001   |
| Trichome den.  | 0.49       | 151.82 | <0.001   |
| Leaf tough.    | 0.34       | 69.95  | <0.001   |
| Plant height   | 0.59       | 218.92 | <0.001   |
| IR 1104.64     | 0.13       | 12.79  | <0.001   |
| IR 1085.1      | 0.15       | 16.20  | <0.001   |
| IR 1072.19     | 0.10       | 7.01   | 0.004    |
| IR 1039.74     | 0.16       | 17.46  | <0.001   |
| IR 1024.17     | 0.10       | 8.48   | 0.001    |
| IR 1010.93     | 0.17       | 20.27  | <0.001   |
| IR 998.34      | 0.29       | 54.85  | <0.001   |
| IR 985.1       | 0.12       | 10.78  | <0.001   |
| IR 944.37      | 0.10       | 7.46   | 0.003    |
| IR 937.09      | 0.23       | 35.98  | <0.001   |
| IR 929.14      | 0.15       | 16.76  | <0.001   |
| IR 918.54      | 0.12       | 11.63  | <0.001   |
| IR 892.38      | 0.13       | 11.99  | <0.001   |
| IR 855.96      | 0.13       | 13.19  | <0.001   |
| IR 840.07      | 0.23       | 36.36  | <0.001   |
| IR 830.13      | 0.36       | 80.73  | <0.001   |
| IR 818.21      | 0.24       | 40.84  | <0.001   |
| IR 793.71      | 0.14       | 15.10  | <0.001   |
| IR 757.28      | 0.09       | 6.05   | 0.007    |
| Wgt. 8 days    | 0.07       | 3.99   | 0.019    |
| Wgt. 16 days   | 0.41       | 93.69  | <0.001   |
| Surv. pupation | 0.24       | 40.33  | <0.001   |
| Surv. eclosion | 0.05       | 2.39   | 0.059    |



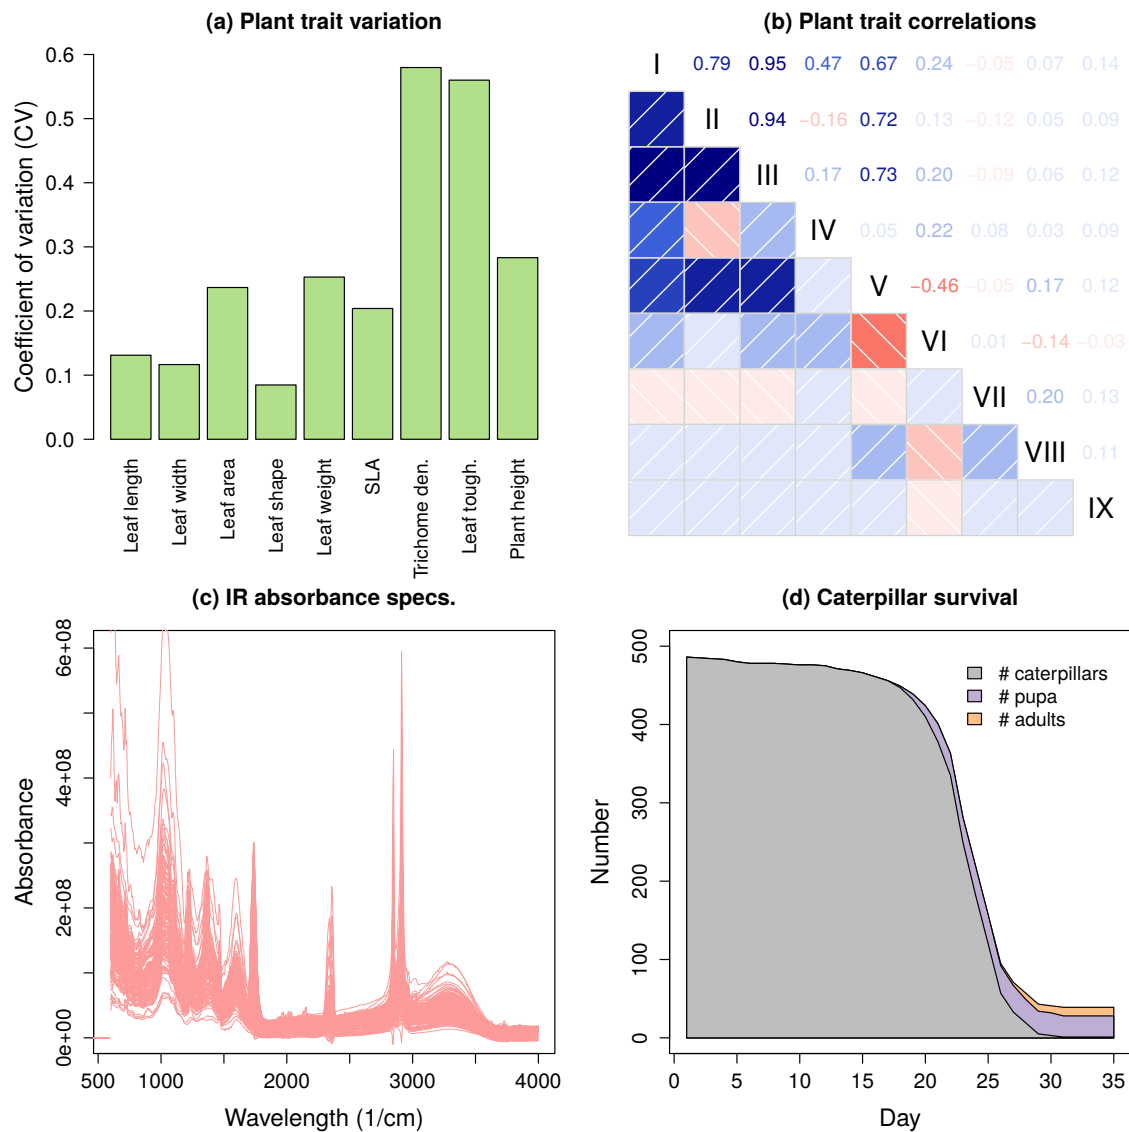

Figure 1: Plant (*M. truncatula*) and caterpillar (*L. melissa*) phenotypic data. Panel (a) provides the coefficient of variation (CV) for each of the nine plant growth/defense traits. Panel (b) presents pairwise phenotypic correlations for the same nine traits (roman numerals denote the trait numbers ordered as in panel a). Pearson correlations are shown in the upper triangle of the correlation matrix, and depicted graphically in the lower triangle of the correlation matrix, with darker shading denoting higher correlations. Panel (c) shows the infrared (IR) absorbance spectra for each plant (one line per plant) (see Fig. S2 for phenotypic correlations for the IR traits). Panel (d) gives the number of caterpillars, pupa, and adults (and thus the total number of *L. melissa*) alive at 0 to 35 days of age.

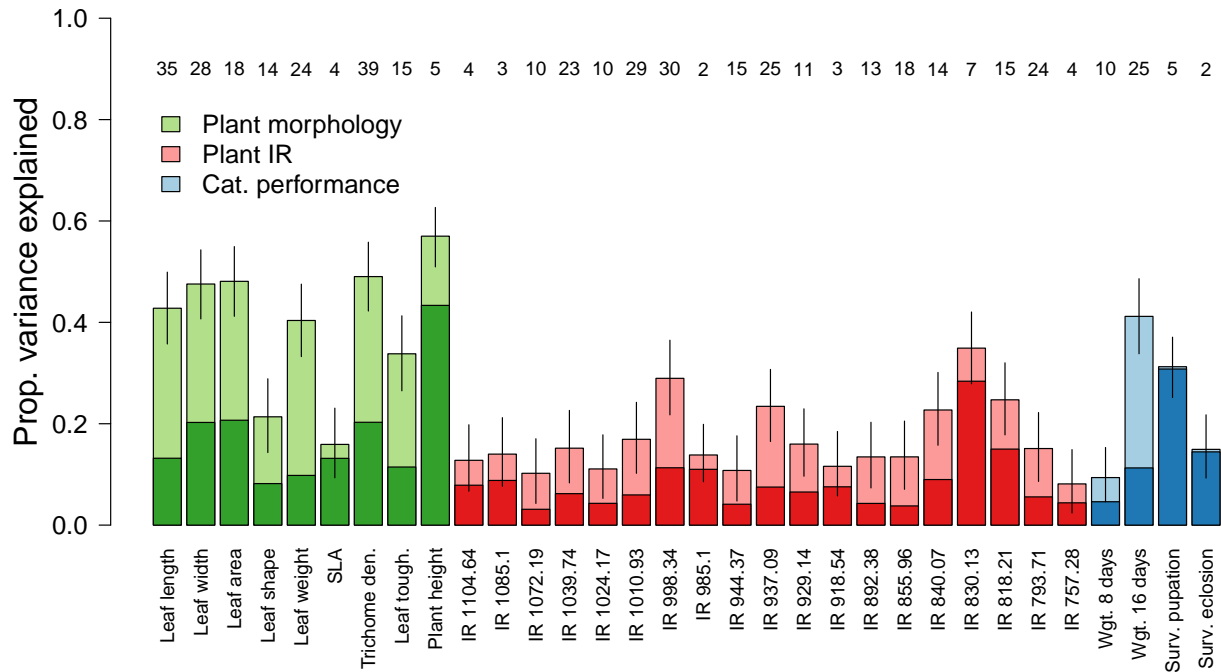

Figure 2: Graphical summary of plant (*M. truncatula*) and caterpillar (*L. melissa*) trait variation explained by *M. truncatula* genetics. Bars denote the posterior median for the proportion of trait variation explained by plant genetics (PVE); vertical lines denote the 90% equal-tail probability intervals (ETPIs). Darker shaded regions of the bars provide point estimates (posterior median) for the subset of the PVE attributed to genetic variants with measurable effects (as opposed to infinitesimal effects). Numbers along the top of the plot give point estimates (posterior median) for the number of causal variants affecting each trait (i.e., total number of distinct QTL). See Table S2 for detailed quantitative summaries of these parameter estimates, including measures of uncertainty in each parameter.

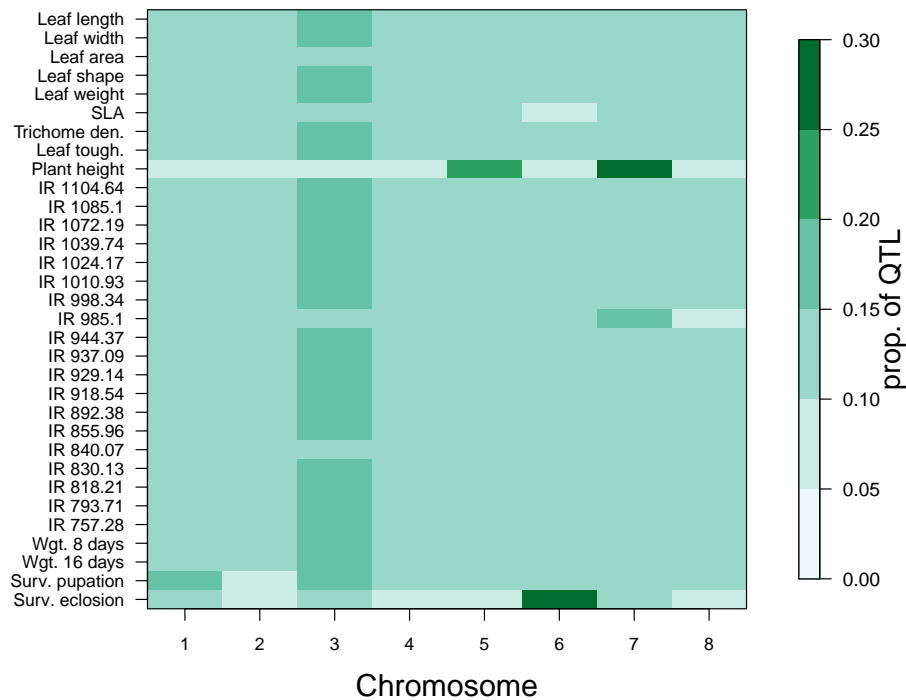

Figure 3: Heatmap image showing the proportion of QTL estimated for each trait on each of the eight *M. truncatula* chromosomes. The number of QTL per chromosome was estimated as the sum of the posterior inclusions probabilities across all SNPs on each chromosome. This was then divided by the total (sum) across chromosomes to obtain the proportions. For most traits, the genetic signal (i.e., QTL) were spread uniformly across chromosomes (also see Fig. S5), but for a few traits, especially plant height and survival to eclosion, QTL were clustered on one or a few chromosomes (also see Fig. S6). Note that chromosome 3 is slightly larger than the other chromosomes and thus harbors a slight excess of QTL for most traits. See Fig. S7 for numbers of QTL on each chromosome.

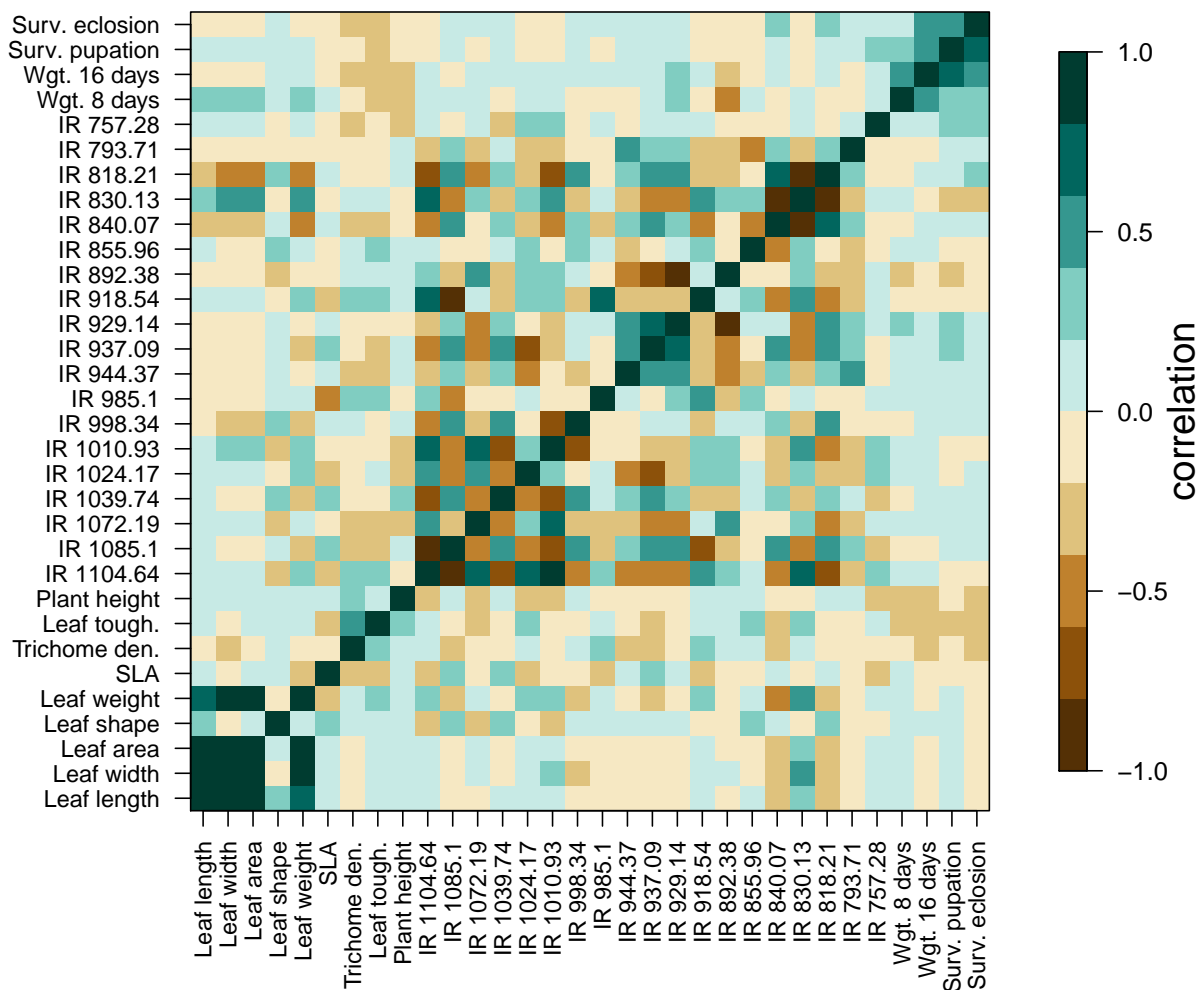

Figure 4: Heat map of (additive) genetic (upper triangle) and mean phenotype (lower triangle) Pearson correlation coefficients for pairs of plant and caterpillar traits. Genetic correlations were computed from genomic estimated breeding values (GEBVs) and mean phenotype correlations were computed using the phenotypic means of each trait for each plant line. Genetic and mean phenotype correlations were highly correlated with one another ( $r = 0.98$ ).

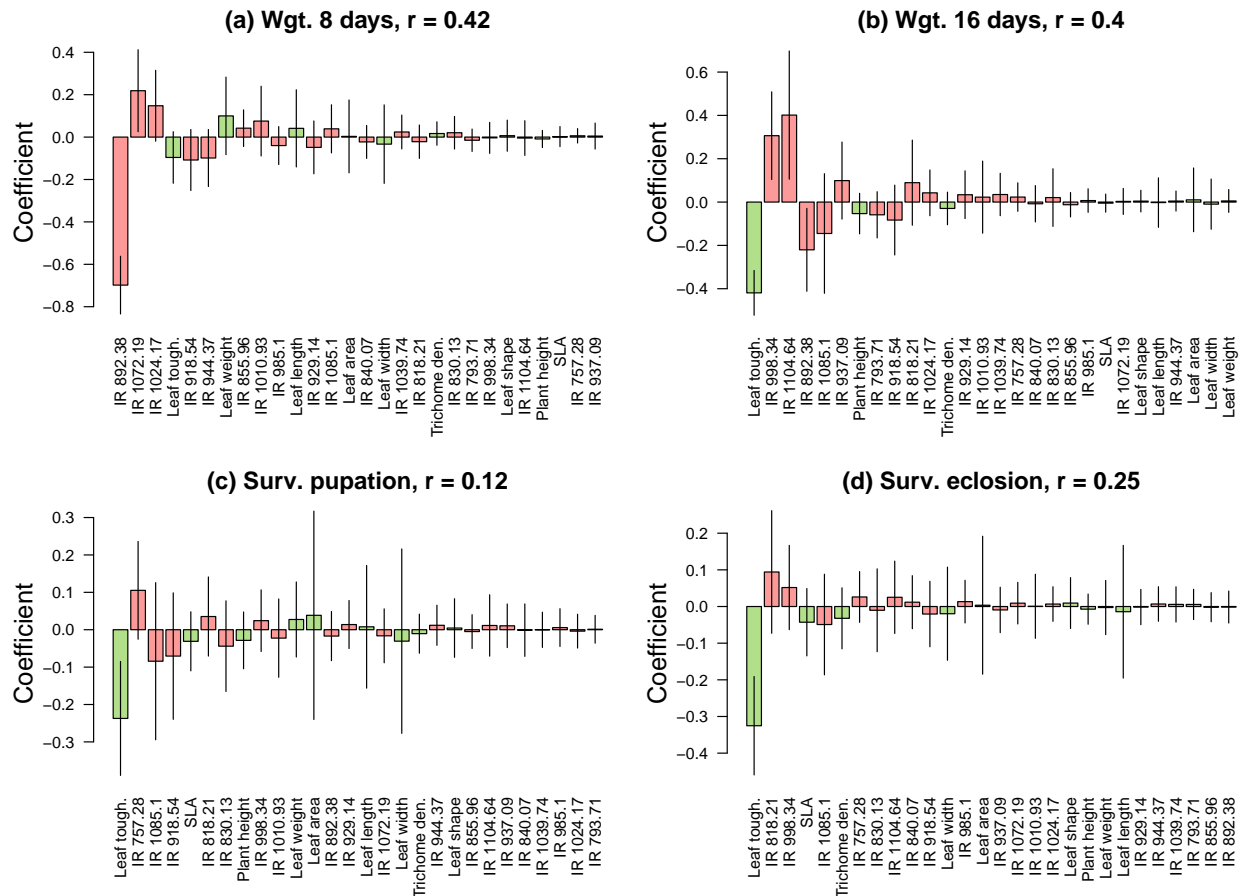

Figure 5: Barplots showing the effect of the genetic component of plant traits on the genetic component of caterpillar performance, specifically (a) weight at 8 days, (b) weight at 16 days, (c) survival to pupation, and (d) survival to eclosion. Bars denote Bayesian model-averaged estimates (posterior means) of standardized regression coefficients for the effect of the genomic estimated breeding values (GEBVs) for each plant trait on the GEBVs for the caterpillar performance traits. Traits are sorted by the absolute magnitude of these estimates. Vertical bars denote  $\pm$  one standard deviation of the posterior (analogous to a standard error). Colors distinguish between plant growth and defense traits (green) and IR traits (pink). Pearson correlations between the caterpillar performance GEBVs and estimates of these from 10-fold cross-validation are given in the panel headers (see the main text for corresponding  $r^2$  values). See Fig. S10 for covariate posterior inclusion probabilities.

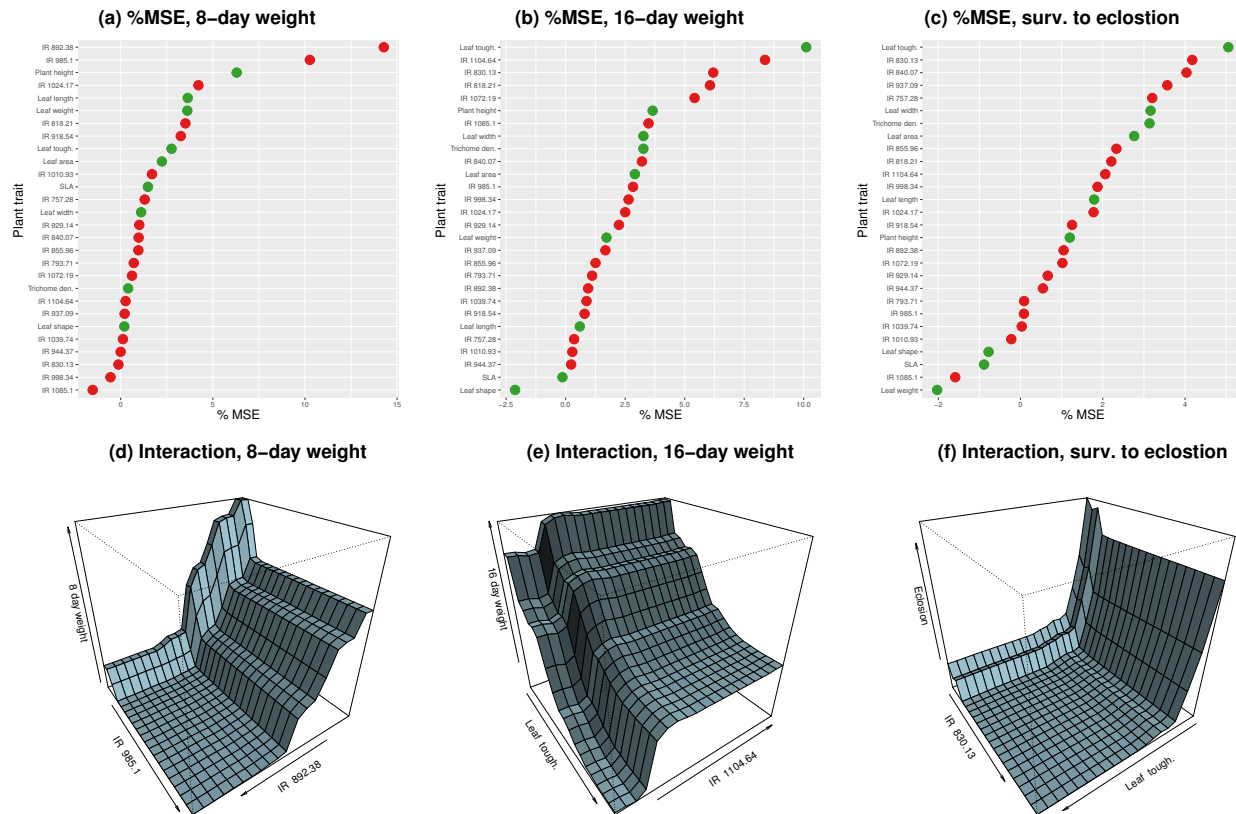

Figure 6: Summary of random forest analysis for predicting caterpillar GEBVs from plant trait GEBVs. Panels (a-c) show the importance of each covariate (plant trait GEBV), and panels (d-f) depict the relationships between the two most important covariates and GEBVs for caterpillar weight at 8 (d) or 16 (e) days and survival to eclosion (f). Plots in d-f were completed with `plotmo` (Milborrow, 2018) and illustrate interactions between the top two predictor variables. See Figs. S11 and S12 for additional interactions.

## Supplemental material for

### Genomic evidence of genetic variation with pleiotropic effects on caterpillar fitness and plant traits in a model legume

Zachariah Gompert<sup>1,2\*</sup>, Megan Brady<sup>1</sup>, Farzaneh Chalyavi<sup>3</sup>, Tara C. Saley<sup>1,2</sup>, Casey S. Philbin<sup>3</sup>, Matthew J. Tucker<sup>3</sup>, Matt L. Forister<sup>4</sup>, Lauren K. Lucas<sup>1</sup>

<sup>1</sup> Department of Biology, Utah State University, Logan, UT 84322, USA

<sup>2</sup> Ecology Center, Utah State University, Logan, UT 84322, USA

<sup>3</sup> Department of Chemistry, University of Nevada, Reno, NV 89557, USA

<sup>4</sup> Department of Biology, University of Nevada, Reno, NV 89557, USA

## 1 Supplemental Methods and Results

### 2 Planting and tending *Medicago truncatula*

3 Our methods for planting and growing *Medicago truncatula* were developed based on <https://www.noble.org/globalassets/docs/medicago-handbook/growing-medicago-truncatula.pdf> and <https://www.noble.org/globalassets/docs/medicago-handbook/vernalization.pdf>. As described in the main text, we first mechanically scarified the seeds with sandpaper, and then placed five seeds from each plant line in 4in × 4in × 3.5in pots with a 4:1 mixture of Sunshine Mix #4 soil and Perlite. Seeds were placed on top of wet soil in a slight divot, and then covered with ~10mm mixture of a dry soil and Perlite. We then misted the pots and covered them with humidity domes until germination. 10 pots were placed under each humidity dome, and the placement of pots (within and among domes and trays) was randomized within each replicate (i.e., block). Plants were thinned on May 26th (i.e., after germination was complete) to ensure that no pots had more than two plants. This was done to minimize competition among plants, while still providing sufficient plant biomass for our caterpillar rearing experiments. Ladybugs were introduced into the greenhouse on July 8th and 9th for biological control of aphids and other pests.

### 17 BSLMMs fit to randomized data

18 Past work has shown that BSLMMs provide a robust method for genome-wide association mapping and genomic prediction (e.g., Zhou *et al.*, 2013; Gompert *et al.*, 2017), even when modeling binary traits (Guan & Stephens, 2011). However, we were concerned that the models might perform poorly when presented with binary data where most individuals had either 0s or 1s, as is the case for our survival data (particularly survival to eclosion). To assess this possibility, and specifically to verify that our results would not be expected for random phenotypic data, we analyzed 12 pseudo-data sets. We obtained these 12 data sets by randomizing the trait data for each of the four caterpillar performance traits three times (generating 12 randomized data sets total). Thus, half of these data sets were based on the binary survival data, and half on more standard quantitative data. We then fit BSLMMs for each of the 12 pseudo-data sets using *gemma* (version 0.94.1; Zhou *et al.*, 2013) with 15 MCMC runs each with a 500,000 iteration burn-in followed by 2 million sampling steps with a thinning interval of 20. As with the actual data sets, we only considered SNPs with a minor allele frequency greater than 0.01. Results from these analyses are shown in Fig. S4 and presented in the main text of this manuscript.



## 33 Supplemental Tables and Figures

| ID    | Population | Country  | Source           |
|-------|------------|----------|------------------|
| HM001 | SA22322    | Syria    | INRA-Montpellier |
| HM003 | ESP105-L   | Spain    | INRA-Montpellier |
| HM004 | DZA045-6   | Algeria  | INRA-Montpellier |
| HM008 | DZA012-J   | Algeria  | INRA-Montpellier |
| HM009 | GRC020-B   | Greece   | INRA-Montpellier |
| HM010 | SA24714    | Italy    | INRA-Montpellier |
| HM011 | DZA327-7   | Algeria  | INRA-Montpellier |
| HM012 | SA26063    | Morocco  | INRA-Montpellier |
| HM027 | F83005-9   | France   | INRA-Montpellier |
| HM032 | F11005-E   | France   | INRA-Montpellier |
| HM035 | F66017     | France   | INRA-Montpellier |
| HM039 | SA03116    | Israel   | INRA-Montpellier |
| HM040 | SA03780    | Italy    | INRA-Montpellier |
| HM041 | SA09048    | Libya    | INRA-Montpellier |
| HM044 | SA14161    | Jordan   | INRA-Montpellier |
| HM046 | SA27882    | Morocco  | INRA-Montpellier |
| HM048 | DZA016-F   | Algeria  | INRA-Montpellier |
| HM049 | DZA058-5   | Algeria  | INRA-Montpellier |
| HM055 | DZA326     | Algeria  | INRA-Montpellier |
| HM058 | ESP163-E   | Spain    | INRA-Montpellier |
| HM060 | F20015-10  | France   | INRA-Montpellier |
| HM061 | GRC033-B2  | Greece   | INRA-Montpellier |
| HM065 | PRT179-J   | Portugal | INRA-Montpellier |
| HM070 | SA08625    | Morocco  | INRA-Montpellier |
| HM073 | SA09710    | Tunisia  | INRA-Montpellier |
| HM076 | SA23859    | Tunisia  | INRA-Montpellier |
| HM079 | DZA045-4c  | Algeria  | INRA-Montpellier |
| HM080 | DZA061-B3d | Algeria  | INRA-Montpellier |
| HM081 | DZA202-5   | Algeria  | INRA-Montpellier |
| HM087 | DZA323-1   | Algeria  | INRA-Montpellier |
| HM091 | ESP171-F   | Spain    | INRA-Montpellier |
| HM105 | SA09137    | Algeria  | INRA-Montpellier |
| HM106 | SA09434    | Tunisia  | INRA-Montpellier |
| HM108 | SA09715    | Tunisia  | INRA-Montpellier |
| HM111 | SA27192    | Italy    | INRA-Montpellier |
| HM115 | Cyprus_C   | Cyprus   | INRA-Montpellier |
| HM117 | ESP031-A   | Spain    | INRA-Montpellier |
| HM120 | ESP095-C   | Spain    | INRA-Montpellier |
| HM127 | F20025-F   | France   | INRA-Montpellier |
| HM130 | F20069-C   | France   | INRA-Montpellier |
| HM135 | SA02748    | Israel   | INRA-Montpellier |
| HM139 | SA08623    | Morocco  | INRA-Montpellier |
| HM143 | SA10481    | Tunisia  | INRA-Montpellier |
| HM146 | SA21302    | Libya    | INRA-Montpellier |

| ID    | Population  | Country   | Source           |
|-------|-------------|-----------|------------------|
| HM150 | SA22323     | Syria     | INRA-Montpellier |
| HM163 | DZA061-11   | Algeria   | INRA-Montpellier |
| HM165 | DZA231-1    | Algeria   | INRA-Montpellier |
| HM177 | ESP100-G    | Spain     | INRA-Montpellier |
| HM179 | ESP162-A    | Spain     | INRA-Montpellier |
| HM180 | ESP163-C    | Spain     | INRA-Montpellier |
| HM184 | F20058-B    | France    | INRA-Montpellier |
| HM186 | GRC024-H    | Greece    | INRA-Montpellier |
| HM194 | SA09700     | Tunisia   | INRA-Montpellier |
| HM195 | SA09728     | Tunisia   | INRA-Montpellier |
| HM196 | SA09970     | Tunisia   | INRA-Montpellier |
| HM199 | SA19983     | Cyprus    | INRA-Montpellier |
| HM202 | SA25941     | Italy     | INRA-Montpellier |
| HM205 | SA28375     | Portugal  | INRA-Montpellier |
| HM253 | PI660496SSD | France    | USDA-ARS         |
| HM256 | PI442895SSD | Australia | USDA-ARS         |
| HM259 | PI577599SSD | Greece    | USDA-ARS         |
| HM260 | PI516934SSD | Morocco   | USDA-ARS         |
| HM262 | PI564941SSD | Morocco   | USDA-ARS         |
| HM266 | PI660450SSD | Algeria   | USDA-ARS         |
| HM267 | PI660437SSD | Algeria   | USDA-ARS         |
| HM268 | PI660438SSD | Algeria   | USDA-ARS         |
| HM269 | PI660470SSD | Unknown   | USDA-ARS         |
| HM270 | PI493297SSD | Portugal  | USDA-ARS         |
| HM271 | PI384664SSD | Morocco   | USDA-ARS         |
| HM276 | PI577627SSD | Algeria   | USDA-ARS         |
| HM277 | PI577621SSD | Algeria   | USDA-ARS         |
| HM279 | PI660460SSD | Morocco   | USDA-ARS         |
| HM287 | PI577607SSD | Lebanon   | USDA-ARS         |
| HM288 | PI577611SSD | Germany   | USDA-ARS         |
| HM289 | PI577617SSD | Greece    | USDA-ARS         |
| HM290 | PI577640SSD | U.S.      | USDA-ARS         |
| HM293 | PI660411SSD | Italy     | USDA-ARS         |
| HM294 | PI660433SSD | Algeria   | USDA-ARS         |
| HM295 | PI660442SSD | Algeria   | USDA-ARS         |
| HM296 | PI660444SSD | Algeria   | USDA-ARS         |
| HM297 | PI660447SSD | Algeria   | USDA-ARS         |
| HM298 | PI660448SSD | Algeria   | USDA-ARS         |
| HM299 | PI660456SSD | Morocco   | USDA-ARS         |
| HM301 | PI660494SSD | Italy     | USDA-ARS         |
| HM302 | PI283662SSD | Italy     | USDA-ARS         |
| HM307 | PI516927SSD | Morocco   | USDA-ARS         |
| HM308 | PI516933SSD | Morocco   | USDA-ARS         |
| HM309 | PI516939SSD | Morocco   | USDA-ARS         |

| ID    | Population  | Country   | Source   |
|-------|-------------|-----------|----------|
| HM310 | PI535651SSD | Tunisia   | USDA-ARS |
| HM311 | PI535752SSD | Morocco   | USDA-ARS |
| HM312 | PI577609SSD | Sweden    | USDA-ARS |
| HM314 | PI660361SSD | Greece    | USDA-ARS |
| HM315 | PI660387SSD | France    | USDA-ARS |
| HM316 | PI660421SSD | Australia | USDA-ARS |

Table S1: Hapmap IDs, population codes, countries of origin, and seed sources for the 94 *Medicago truncatula* lines used in this study. Additional information about these inbred lines and the *M. truncatula* Hapmap project is available from <http://www.medicagohapmap.org/home/view>.

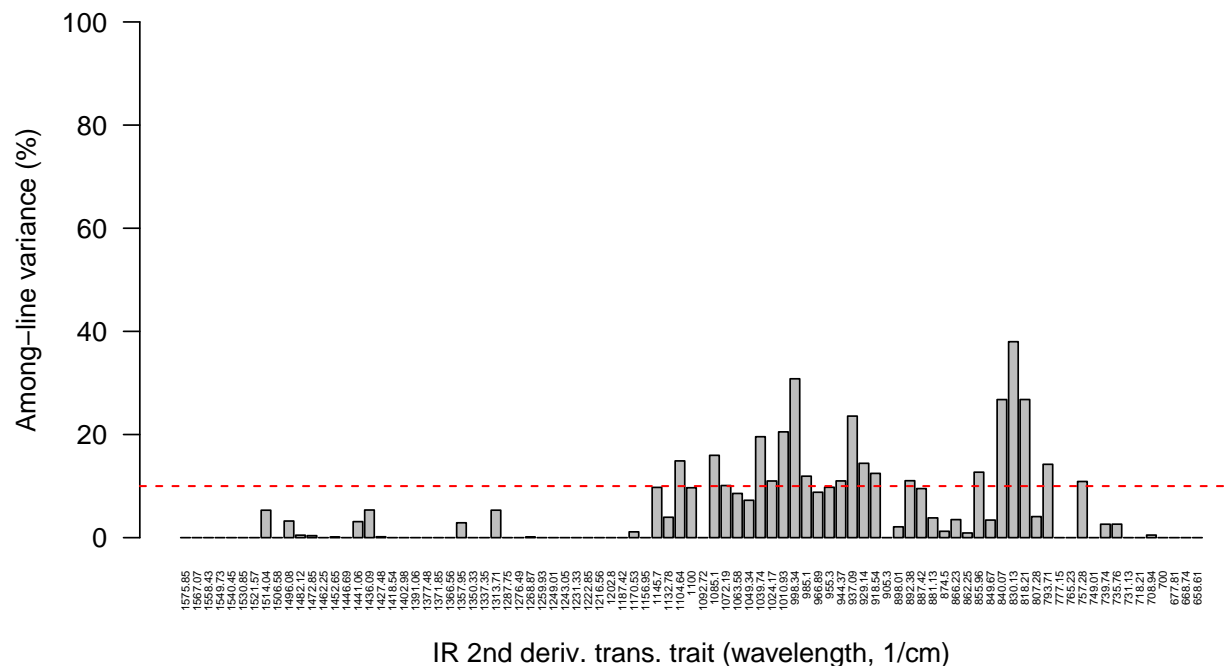

Figure S1: Barplot displaying the percent variance among *M. truncatula* lines (i.e., genotypes) for each infrared (IR) spectra trait. Here, the IR traits are the 2nd derivatives of the transmittance spectra. We only considered IR traits with  $\geq 10\%$  of the variance among lines for downstream analyses (denoted here with a horizontal dashed line).

Table S2: Summary of trait genetic architectures for each plant and caterpillar trait based on the posterior probability distributions from fitting Bayesian sparse linear mixed models. Parameters shown are the proportion of the trait variation explained by *M. truncatula* genetics (PVE), the proportion of the PVE attributable to loci with measurable effects (PGE), and the number of loci with measurable effects (no. QTL). Posterior distributions are summarized based on the median (Med.) and the lower bounds (5th %) and upper bounds (95th %) of the 90% equal-tail probability intervals (ETPIs).

| Trait          | PVE  |       |        | PGE  |       |        | no. QTL |       |        |
|----------------|------|-------|--------|------|-------|--------|---------|-------|--------|
|                | Med. | 5th % | 95th % | Med. | 5th % | 95th % | Med.    | 5th % | 95th % |
| Leaf length    | 0.43 | 0.36  | 0.50   | 0.31 | 0.00  | 0.91   | 35      | 1     | 257    |
| Leaf width     | 0.48 | 0.41  | 0.54   | 0.43 | 0.01  | 0.94   | 28      | 1     | 204    |
| Leaf area      | 0.48 | 0.41  | 0.55   | 0.43 | 0.01  | 0.92   | 18      | 1     | 174    |
| Leaf shape     | 0.21 | 0.14  | 0.29   | 0.38 | 0.00  | 0.93   | 14      | 1     | 231    |
| Leaf weight    | 0.40 | 0.33  | 0.47   | 0.24 | 0.00  | 0.88   | 24      | 0     | 177    |
| SLA            | 0.16 | 0.09  | 0.23   | 0.83 | 0.30  | 0.99   | 4       | 1     | 14     |
| Trichome den.  | 0.49 | 0.42  | 0.56   | 0.41 | 0.01  | 0.94   | 39      | 1     | 249    |
| Leaf tough.    | 0.34 | 0.27  | 0.41   | 0.34 | 0.00  | 0.90   | 15      | 1     | 193    |
| Plant height   | 0.57 | 0.51  | 0.63   | 0.76 | 0.62  | 0.93   | 5       | 2     | 14     |
| IR 1104.64     | 0.13 | 0.07  | 0.20   | 0.62 | 0.07  | 0.95   | 4       | 1     | 133    |
| IR 1085.1      | 0.14 | 0.08  | 0.21   | 0.63 | 0.21  | 0.96   | 3       | 1     | 20     |
| IR 1072.19     | 0.10 | 0.04  | 0.17   | 0.30 | 0.00  | 0.91   | 10      | 0     | 129    |
| IR 1039.74     | 0.15 | 0.08  | 0.23   | 0.41 | 0.00  | 0.93   | 23      | 1     | 200    |
| IR 1024.17     | 0.11 | 0.05  | 0.18   | 0.39 | 0.00  | 0.93   | 10      | 0     | 147    |
| IR 1010.93     | 0.17 | 0.10  | 0.24   | 0.35 | 0.00  | 0.92   | 29      | 0     | 247    |
| IR 998.34      | 0.29 | 0.22  | 0.36   | 0.39 | 0.01  | 0.93   | 30      | 1     | 237    |
| IR 985.1       | 0.14 | 0.09  | 0.20   | 0.80 | 0.52  | 0.98   | 2       | 1     | 6      |
| IR 944.37      | 0.11 | 0.05  | 0.18   | 0.38 | 0.00  | 0.94   | 15      | 0     | 211    |
| IR 937.09      | 0.23 | 0.17  | 0.31   | 0.32 | 0.00  | 0.91   | 25      | 0     | 212    |
| IR 929.14      | 0.16 | 0.10  | 0.23   | 0.41 | 0.00  | 0.94   | 11      | 1     | 135    |
| IR 918.54      | 0.12 | 0.06  | 0.18   | 0.65 | 0.15  | 0.96   | 3       | 1     | 123    |
| IR 892.38      | 0.14 | 0.07  | 0.20   | 0.32 | 0.00  | 0.92   | 13      | 0     | 147    |
| IR 855.96      | 0.14 | 0.07  | 0.20   | 0.28 | 0.00  | 0.90   | 18      | 0     | 194    |
| IR 840.07      | 0.23 | 0.16  | 0.30   | 0.40 | 0.00  | 0.93   | 14      | 1     | 207    |
| IR 830.13      | 0.35 | 0.28  | 0.42   | 0.81 | 0.28  | 0.98   | 7       | 2     | 267    |
| IR 818.21      | 0.25 | 0.18  | 0.32   | 0.61 | 0.03  | 0.96   | 15      | 2     | 195    |
| IR 793.71      | 0.15 | 0.09  | 0.22   | 0.37 | 0.00  | 0.93   | 24      | 1     | 243    |
| IR 757.28      | 0.08 | 0.02  | 0.15   | 0.54 | 0.01  | 0.95   | 4       | 1     | 96     |
| Wgt. 8 days    | 0.09 | 0.05  | 0.15   | 0.49 | 0.00  | 0.97   | 10      | 0     | 67     |
| Wgt. 16 days   | 0.41 | 0.34  | 0.49   | 0.27 | 0.00  | 0.90   | 25      | 1     | 202    |
| Surv. pupation | 0.31 | 0.25  | 0.37   | 0.99 | 0.93  | 1.00   | 5       | 3     | 8      |
| Surv. eclosion | 0.15 | 0.09  | 0.22   | 0.97 | 0.84  | 1.00   | 2       | 1     | 6      |

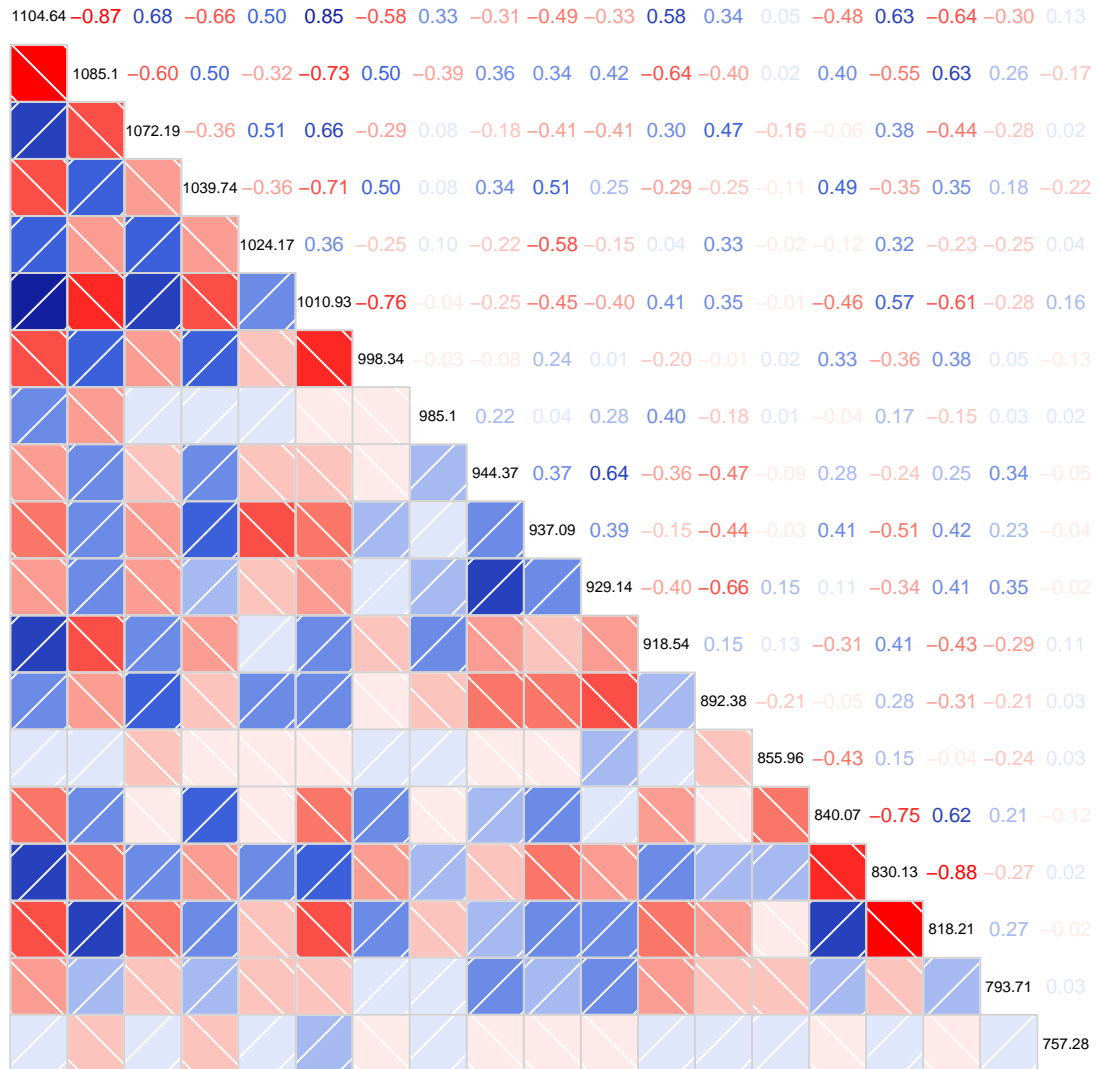

Figure S2: Correlogram giving pairwise phenotypic correlations for the 19 near-infrared spectra 2nd derivative traits. Pearson correlations are shown in the upper triangle of the correlation matrix, and depicted graphically in the lower triangle of the correlation matrix, with darker shading denoting higher correlations. Wavelengths defining each trait are given along the diagonal.

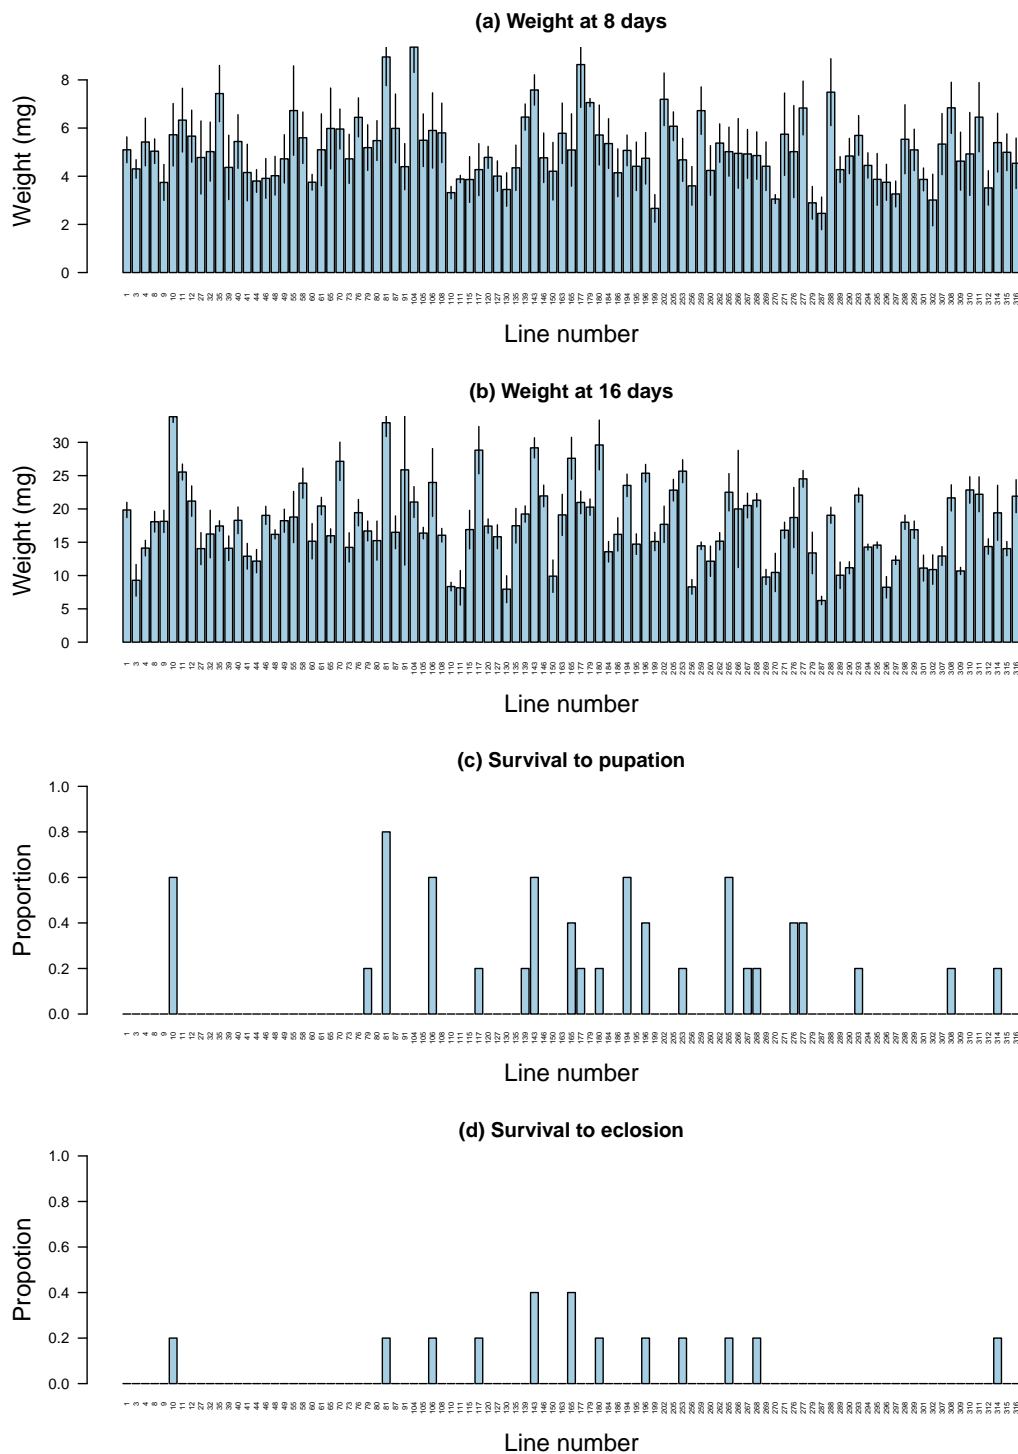

Figure S3: Barplots depict caterpillar performance traits as a function of *M. truncatula* inbred line. Colored bars denote the mean across replicates and vertical lines give the standard errors.



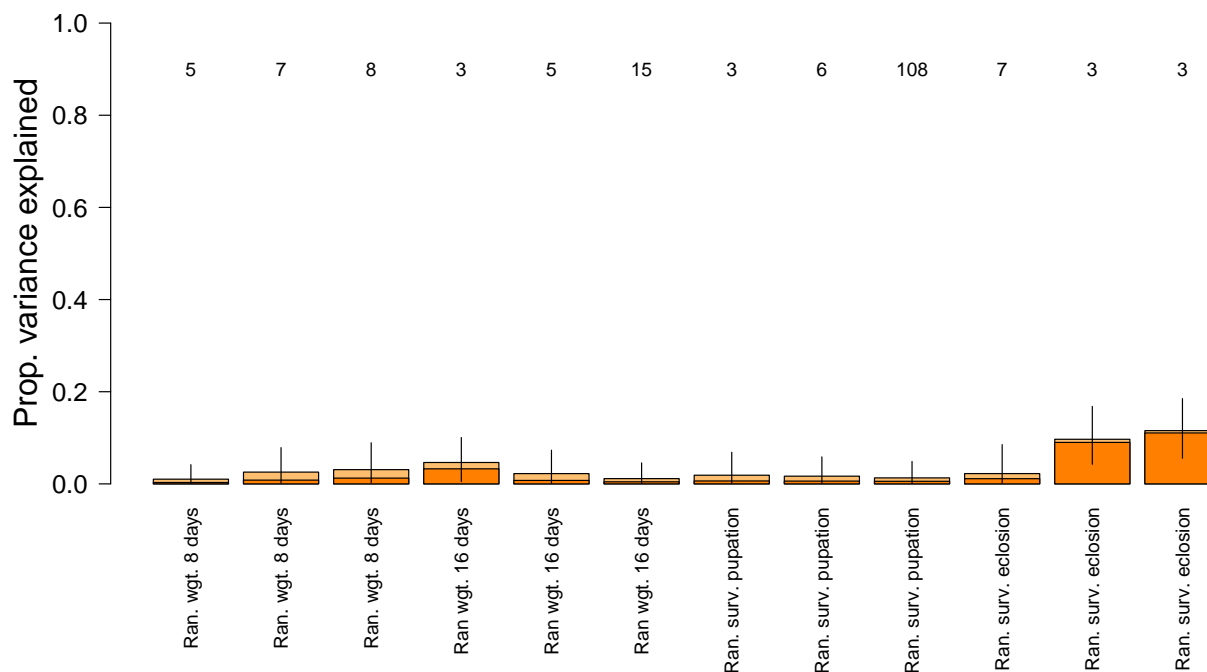

Figure S4: Graphical summary of permuted caterpillar (*L. melissa*) trait variation explained by *M. truncatula* genetics. Bars denote the posterior median for the proportion of permuted trait variation explained by plant genetics (PVE); vertical lines denote the 90% equal-tail probability intervals (ETPIs). Darker shaded regions of the bars provide a point estimate (posterior median) for the subset of the PVE that attributed to genetic variants with measurable effects (PGE; as opposed to infinitesimal effects). Numbers along the top of the plot give point estimates (posterior median) for the number of causal variants affecting each trait. Results are based on three replicate, randomized data sets where caterpillar trait data for each performance metric was permuted across *M. truncatula* lines (i.e., genotypes). Compare to results based on the true (unpermuted) data shown in Fig. 2.

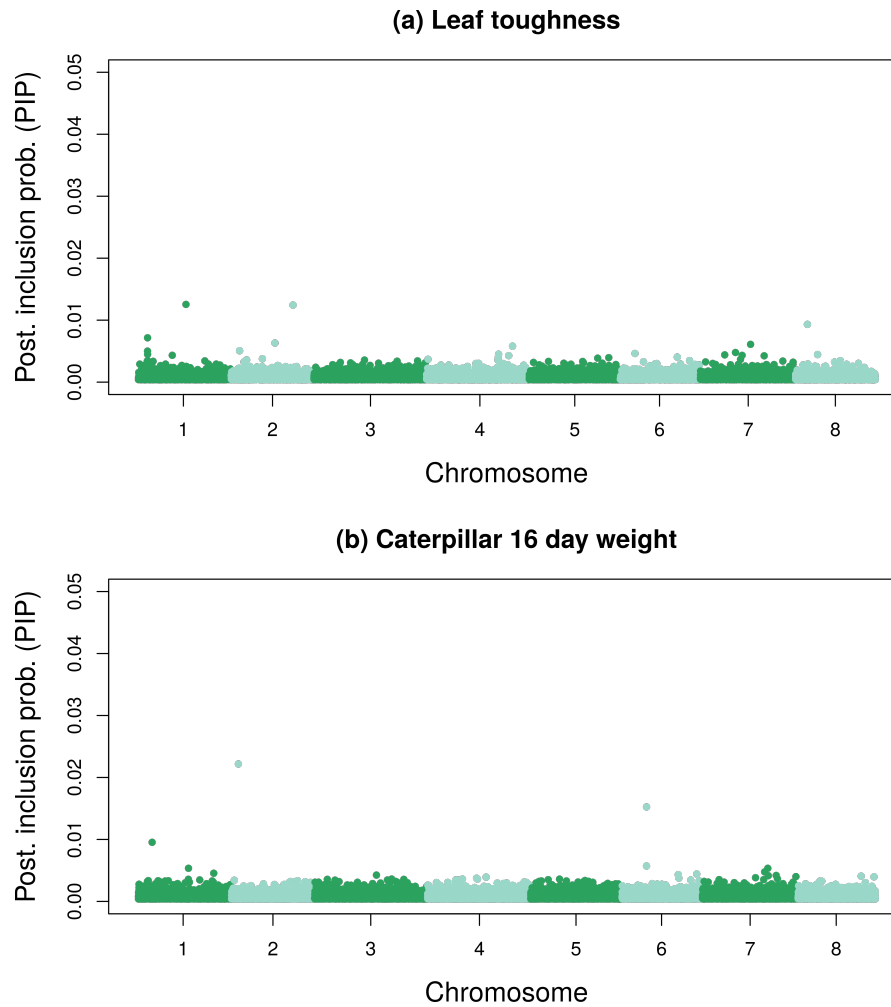

Figure S5: Manhattan plots showing posterior inclusion probabilities (PIPs) from Bayesian sparse linear mixed models relating (a) leaf toughness or (b) caterpillar weight at 16 days with *M. truncatula* genetics. The y-axis has been scaled to a PIP of 0.05 to show variability in PIPs among SNPs (no SNPs had PIPs higher than this for these traits). As with most traits we analyzed, individual SNPs do not have high PIPs; in other words, these are polygenic traits (compare to Fig. S6). Each point denotes a SNP, and SNPs are colored to show boundaries between chromosomes.

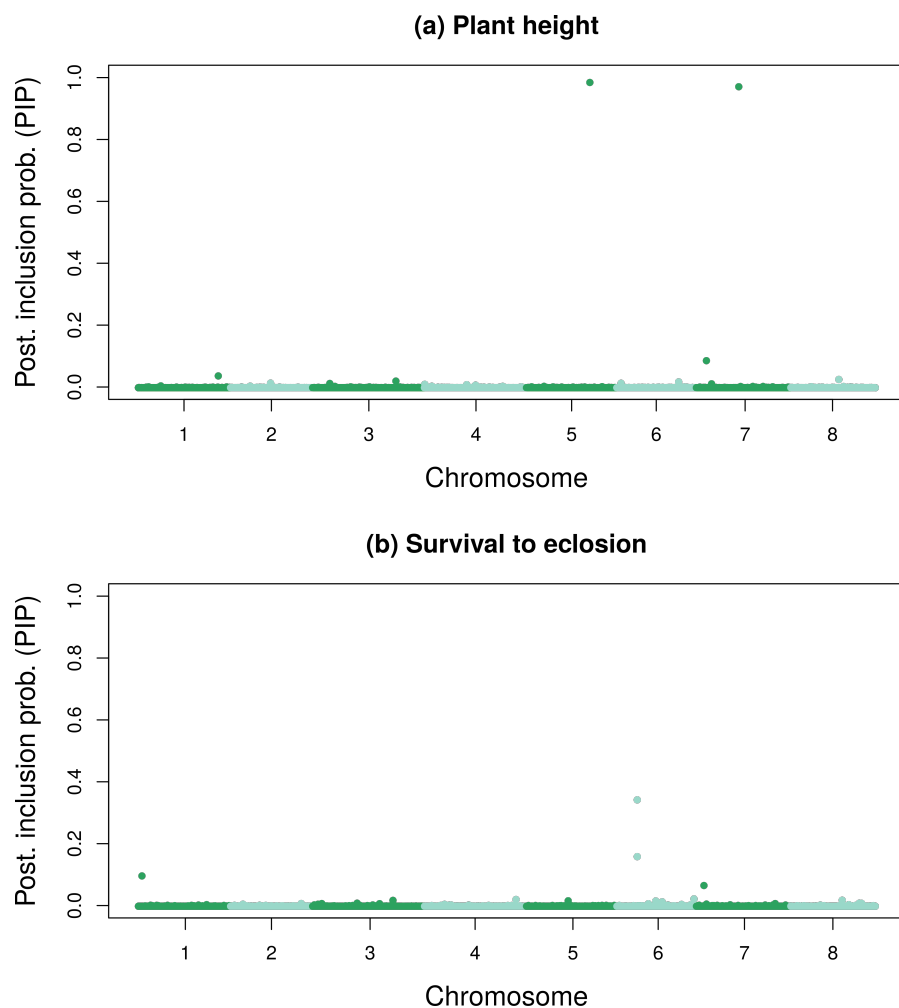

Figure S6: Manhattan plots showing posterior inclusion probabilities (PIPs) from Bayesian sparse linear mixed models relating (a) plant height or (b) survival to eclosion with *M. truncatula* genetics. These traits stand out as having individual SNPs with high PIPs (compare to Fig. S5). Each point denotes a SNP, and SNPs are colored to show boundaries between chromosomes.

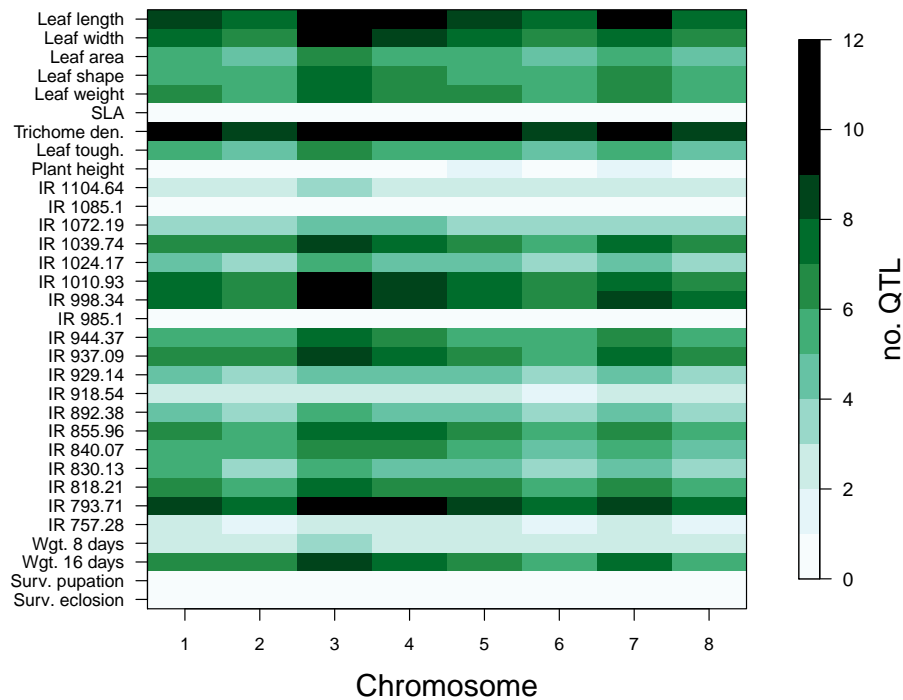

Figure S7: Heat map showing the number of QTL estimated for each trait on each of the eight *M. truncatula* chromosomes. The number of QTL per chromosome was estimated as the sum of the posterior inclusions probabilities across all SNPs on each chromosome. For most traits, the genetic signal (i.e., QTL) were spread uniformly across chromosomes (also see Fig. S5), but for a few traits, especially plant height and survival to eclosion, QTL were clustered on one or a few chromosomes (also see Fig. S6). Note that chromosome 3 is slightly larger than the other chromosomes and thus harbors a slight excess of QTL for most traits. The number of QTL per chromosome (and in general) also varies among traits. See Fig. 3 for the proportion of QTL for each trait on each chromosome.

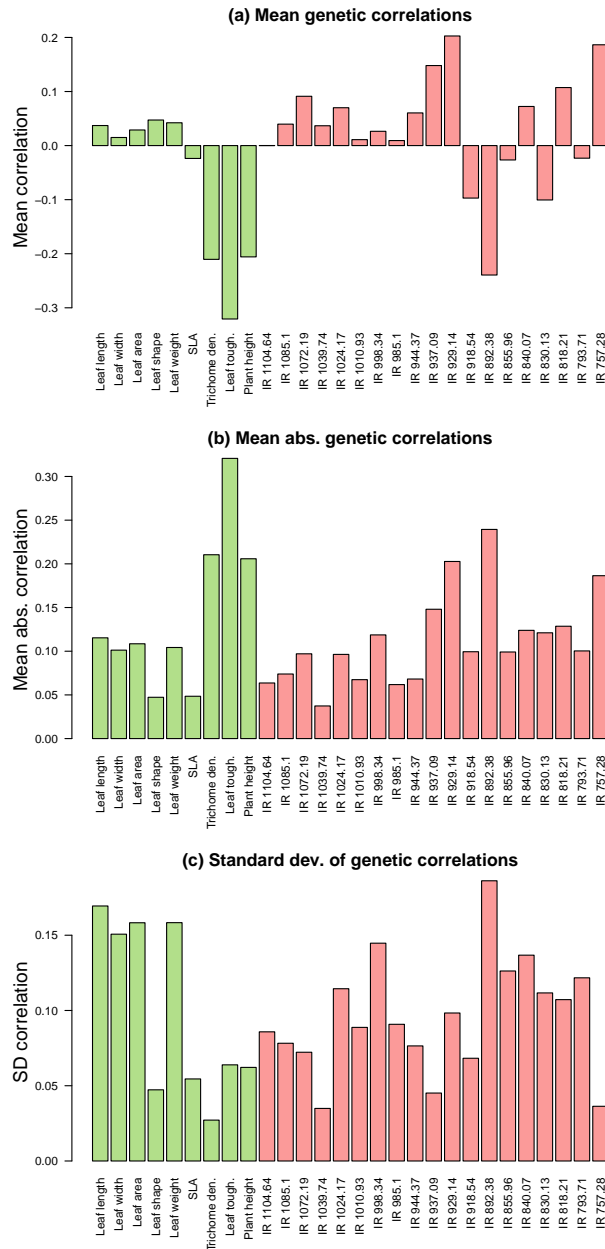

Figure S8: Barplots summarizing genetic correlations between plant traits and caterpillar performance traits. Panels (a) and (b) give the mean signed (a) or absolute value (b) genetic correlation between each plant trait and the four caterpillar performance traits. Panel (c) gives the standard deviation in genetic correlations across the four performance traits.

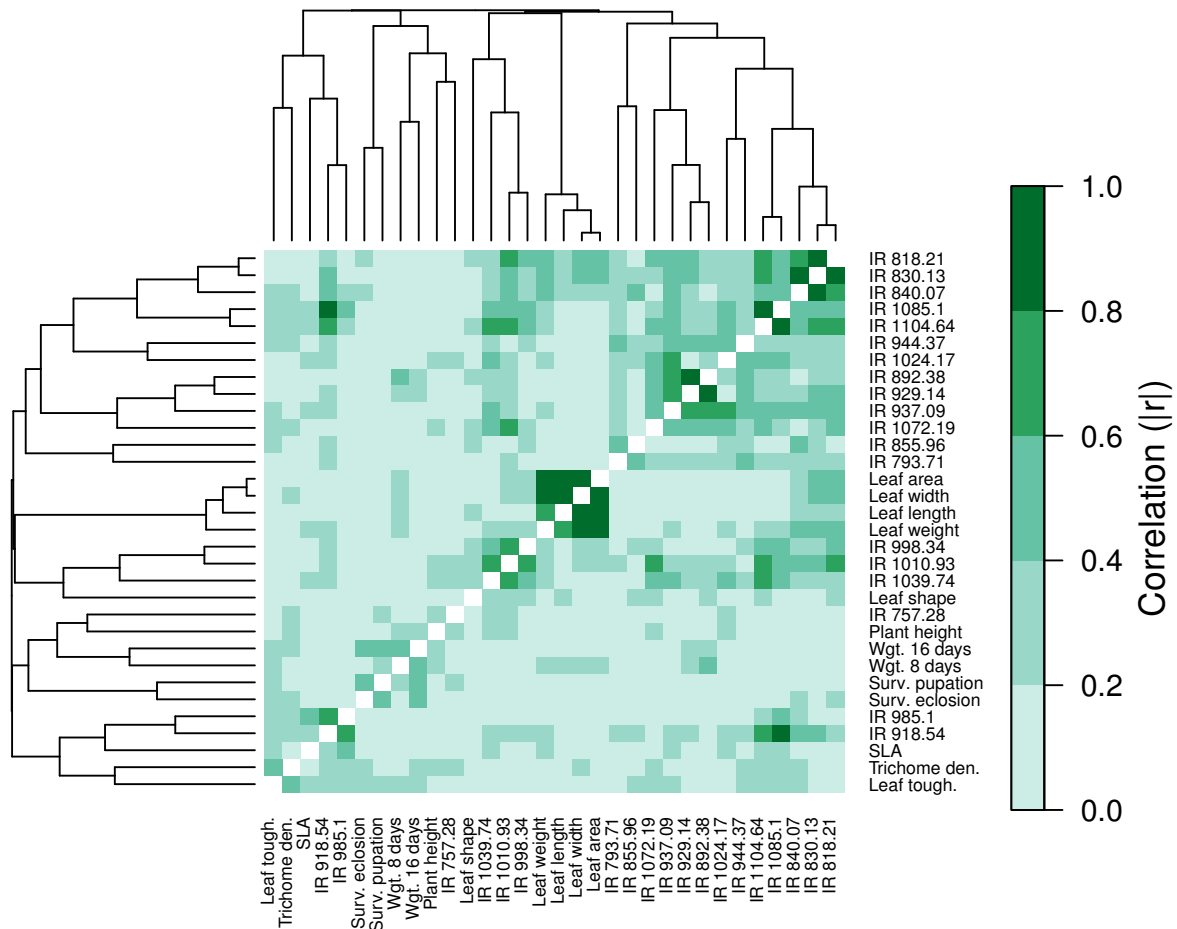

Figure S9: Heat map of genetic correlations for pairs of plant and caterpillar traits (this matrix is symmetric). Genetic correlations were computed from genomic estimated breeding values (GEBVs). Absolute values of correlations are shown. The dendrograms cluster traits by their genetic correlations and were computed with the `heatmap.2` function in R.

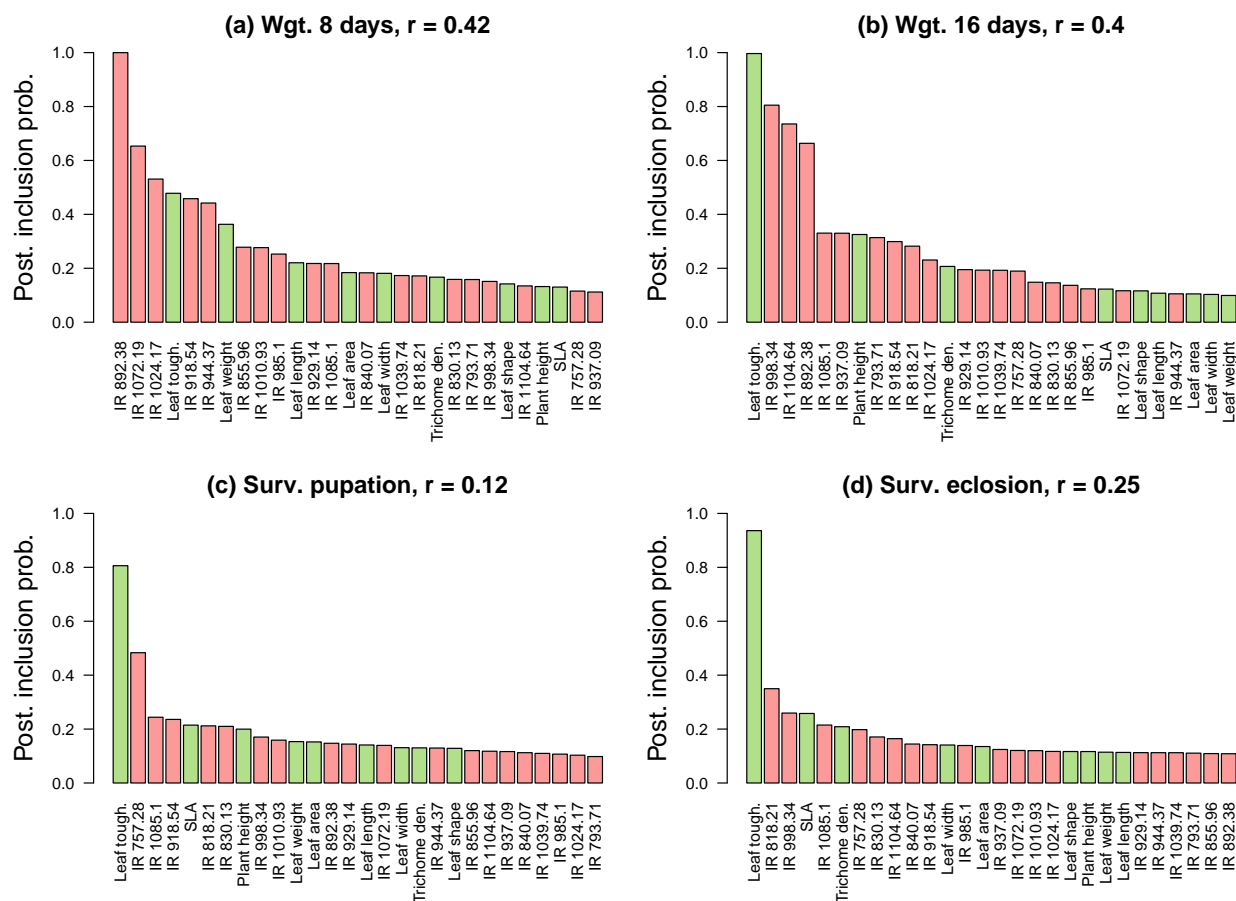

Figure S10: Barplots showing the effect of the genetic component of plant traits on the genetic component of caterpillar performance, specifically (a) weight at 8 days, (b) weight at 16 days, (c) survival to pupation, and (d) survival to eclosion. Bars denote Bayesian posterior inclusion probabilities (PIPs) for the effect of the genomic estimated breeding values (GEBVs) for each plant trait on the GEBVs for the caterpillar performance traits. Traits are sorted by their PIPs. Colors distinguish between plant growth/defense traits (green) and IR traits (pink). Pearson correlations between the caterpillar performance GEBVs and estimates of these from 10-fold cross-validation are given in the panel headers.

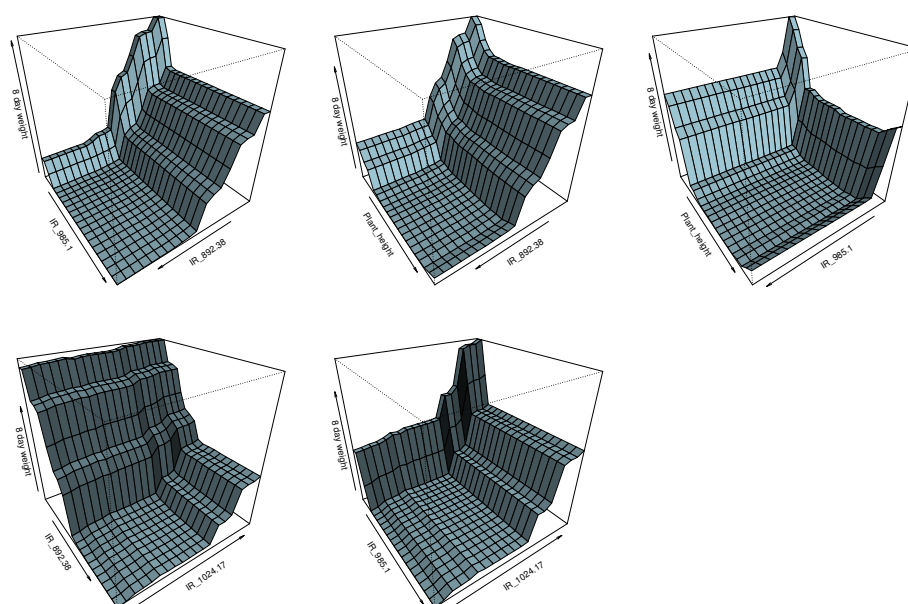

Figure S11: Graphical summary of interactions between pairs of plant trait (GEBVs) that best predict caterpillar 8-day weight GEBVs in the random forest regression analyses. Plots were generated in `plotmo` (Milborrow, 2018), and show interactions and relationships for the top traits.



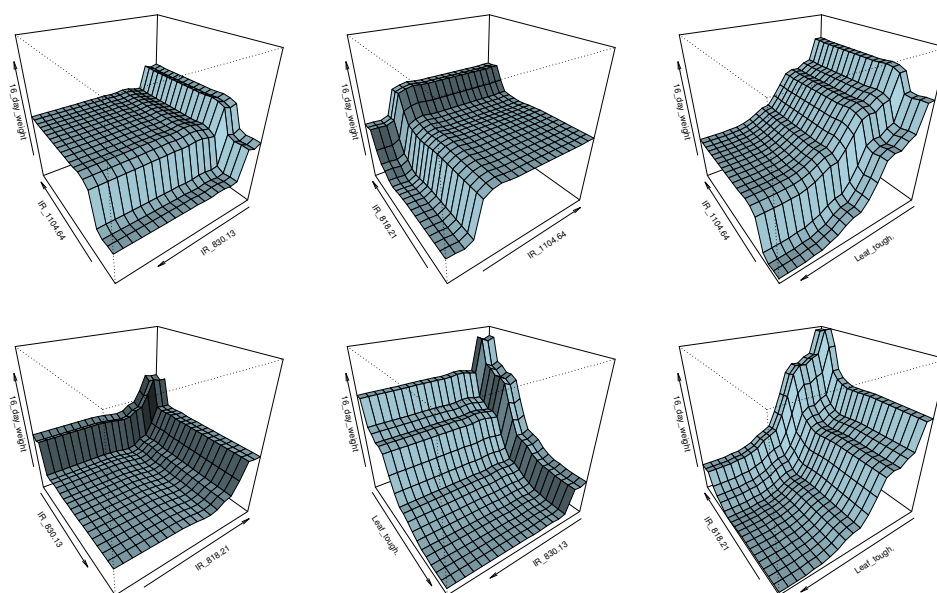

Figure S12: Graphical summary of interactions between pairs of plant trait (GEBVs) that best predict caterpillar 16-day weight GEBVs in the random forest regression analyses. Plots were generated in `plotmo` (Milborrow, 2018), and show interactions and relationships for the top traits.
